# Supplementary material for: Workshop – impact of extended interim storage of high-level radioactive waste on the safety of final disposal
Source: Copernicus journal article supplement (doi:10.5194/sand-2-193-2023), 2023-09-06
Supplement: Supplementary file 1 [file sand-2-193-2023-supplement.zip]

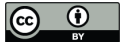

## *Supplement of*

# **Workshop – impact of extended interim storage of high-level radioactive waste on the safety of final disposal**

**Christoph Borkel and Lena Maerten**

*Correspondence to:* Christoph Borkel ([christoph.borkel@base.bund.de](mailto:christoph.borkel@base.bund.de))

- sand-2-193-2023-supplement-title-page.pdf
- sand-2023-115\_Keyno-Extnd-Intrm-Final-Dispsl\_Drck2023Sep14.pdf
- sand-2023-115\_KombiLyse\_safeND2023\_final\_upload.pdf

The copyright of individual parts of the supplement might differ from the article licence.
