# Supplementary material for: Workshop – impact of extended interim storage of high-level radioactive waste on the safety of final disposal
Source: Copernicus journal article supplement (doi:10.5194/sand-2-193-2023), 2023-09-06
Supplement: Supplementary file 2 [file sand-2-193-2023-supplement.zip]

# Results from the KombiLyse Project

## Combined Approach to Safety-Relevant Aspects from the Perspective of Extended Storage and Disposal of High-Level Radioactive Waste

**F.-N. Sentuc, F. Rowold, O. Bartos,  
J. Krüger, J. Nicol, M. Tzivaki, K. Hummelsheim**

# Content

- I. Overview
- II. Framework
- III. Storage Analysis
- IV. Repository (Radionuclide Mobility) Analysis
- V. Results: Course of Actions
- VI. Summary and Conclusion

# KombiLyse: Project Scope and Structure

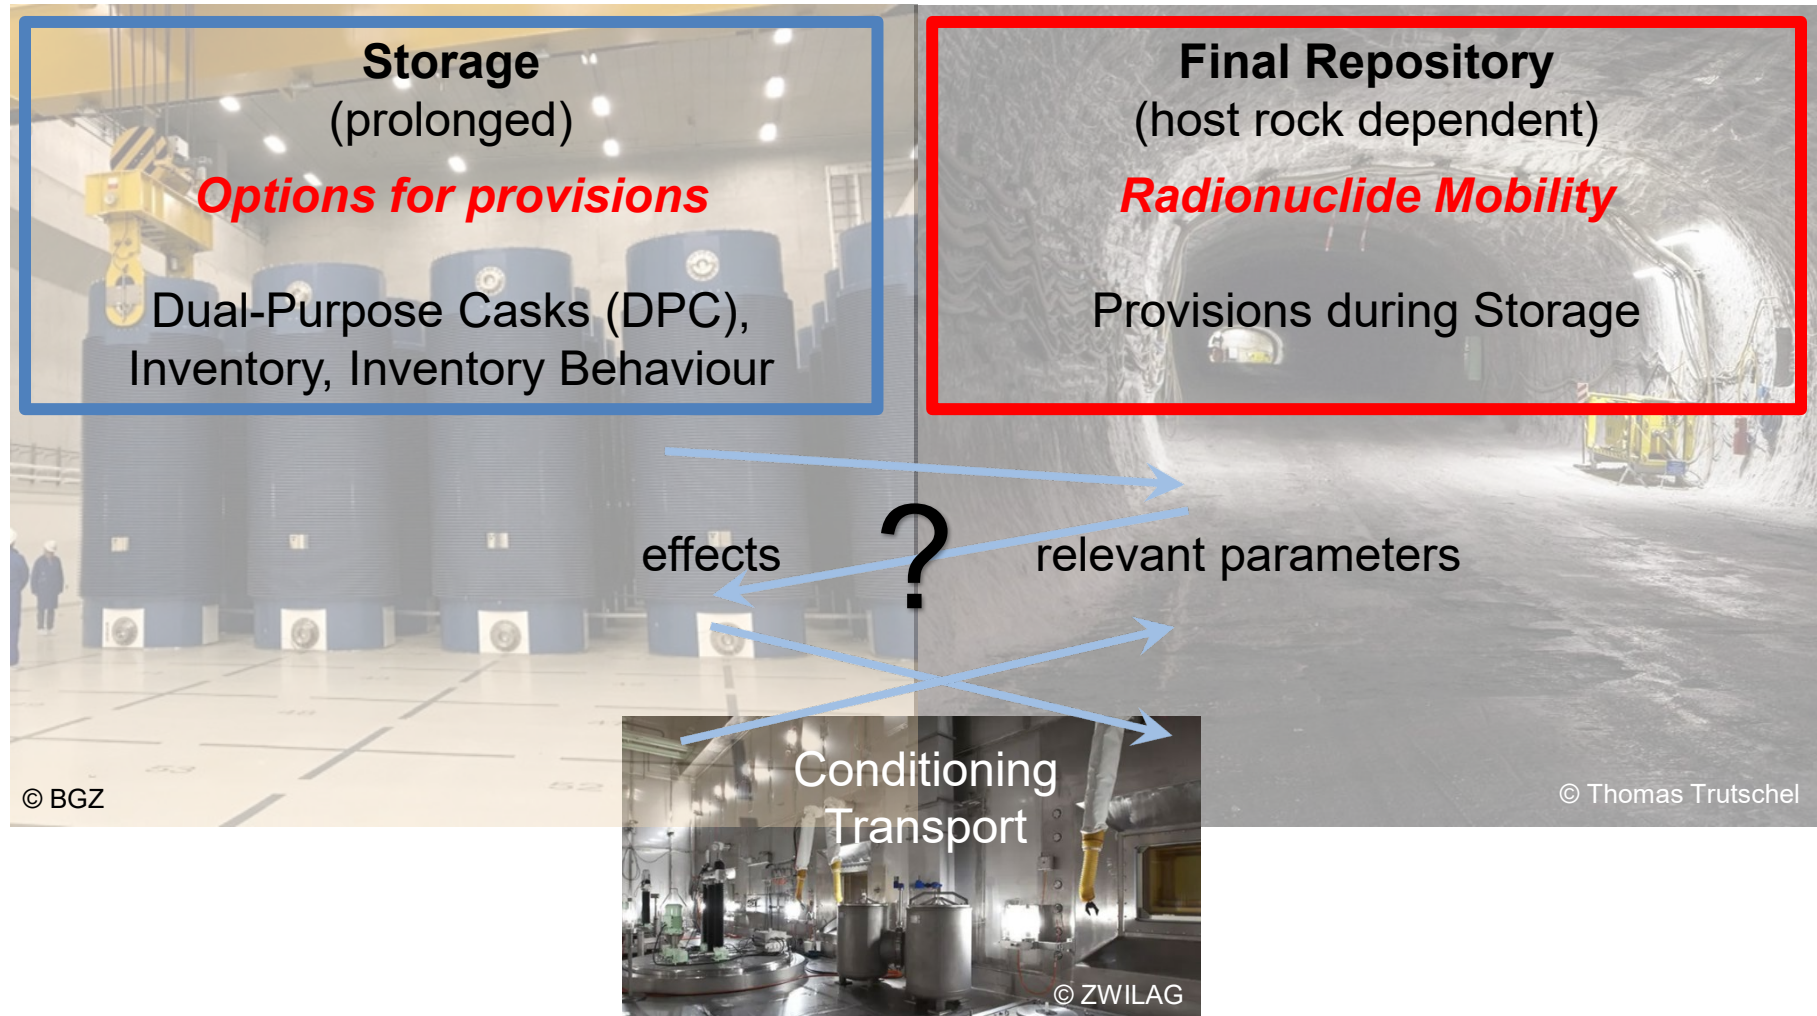



# Inventory

### SF from LWR:

PWR, BWR, WWER

### Chemical composition:

$\text{UO}_2$ ,  $(\text{U,Pu})\text{O}_2$

### Vitrified waste:

- CSD-V
- UK-HAW
- VEK-mold

### Chemical composition:

Borosilicate glass

### Research and Test Reactors:

HTR, TRIGA, MTR, WWR, FBR

### Chemical composition:

$\text{UC}_2$ ,  $\text{ThC}_2$ ,  $\text{UO}_2$ ,  $\text{ThO}_2$ ,  $\text{UCO}$ ,  $\text{UZrH}_x$ ,  $\text{U}_2\text{Si}_3\text{-Al}$ ,  $\text{UO}_2\text{-Mg}$ ,  $\text{Al}$ ,  $(\text{U,Pu})\text{O}_2$

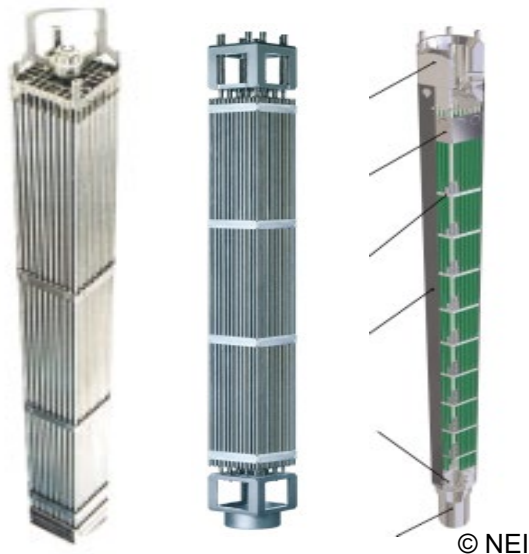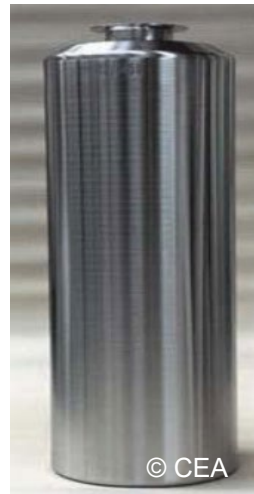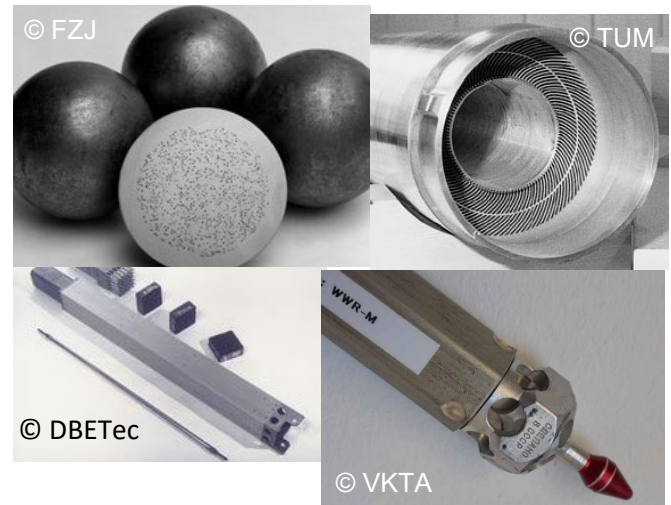

# Reference Final Disposal Concepts

## Salt (Former German)

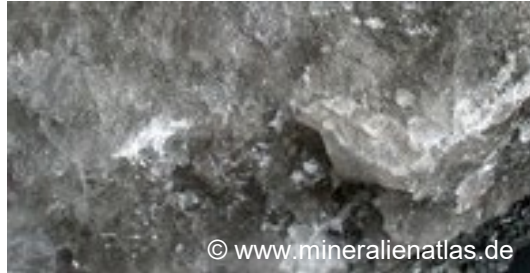

- POLLUX® cask
- $T_{0,cask} = 200\text{ °C}$

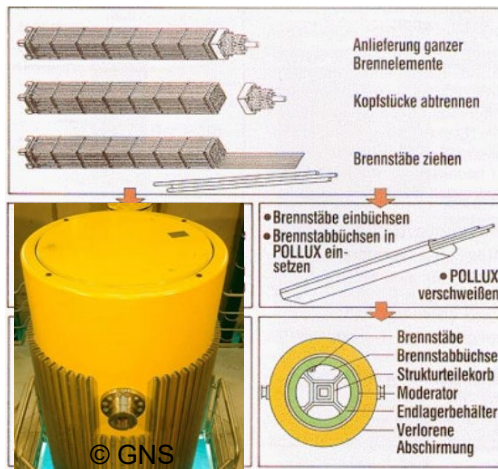

## Clay (Swiss)

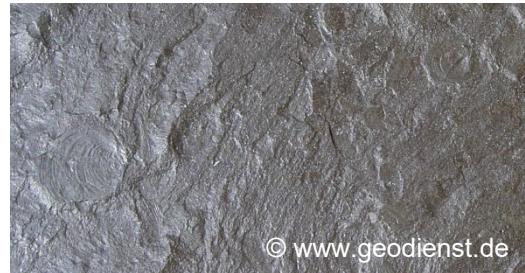

- Steel cask
- Bentonite (Mx-80)
- $T_{0,cask} = 150\text{ °C}$

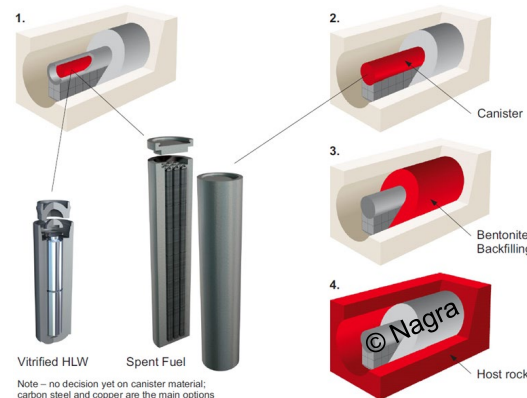

## Crystalline (Swedish)

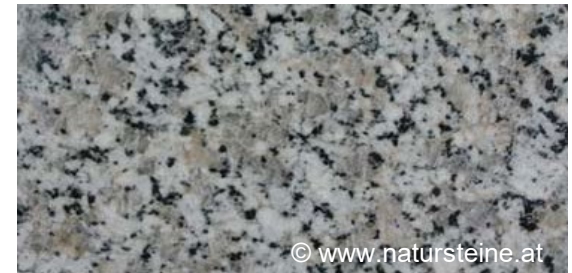

- KBS-3 (iron and copper cask)
- Bentonite (Mx-80)
- $T_{0,cask} = 100\text{ °C}$

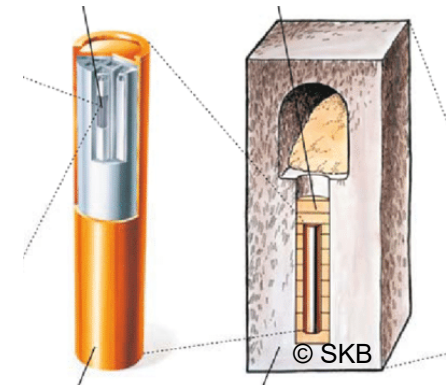

## Concept of Storage Analysis

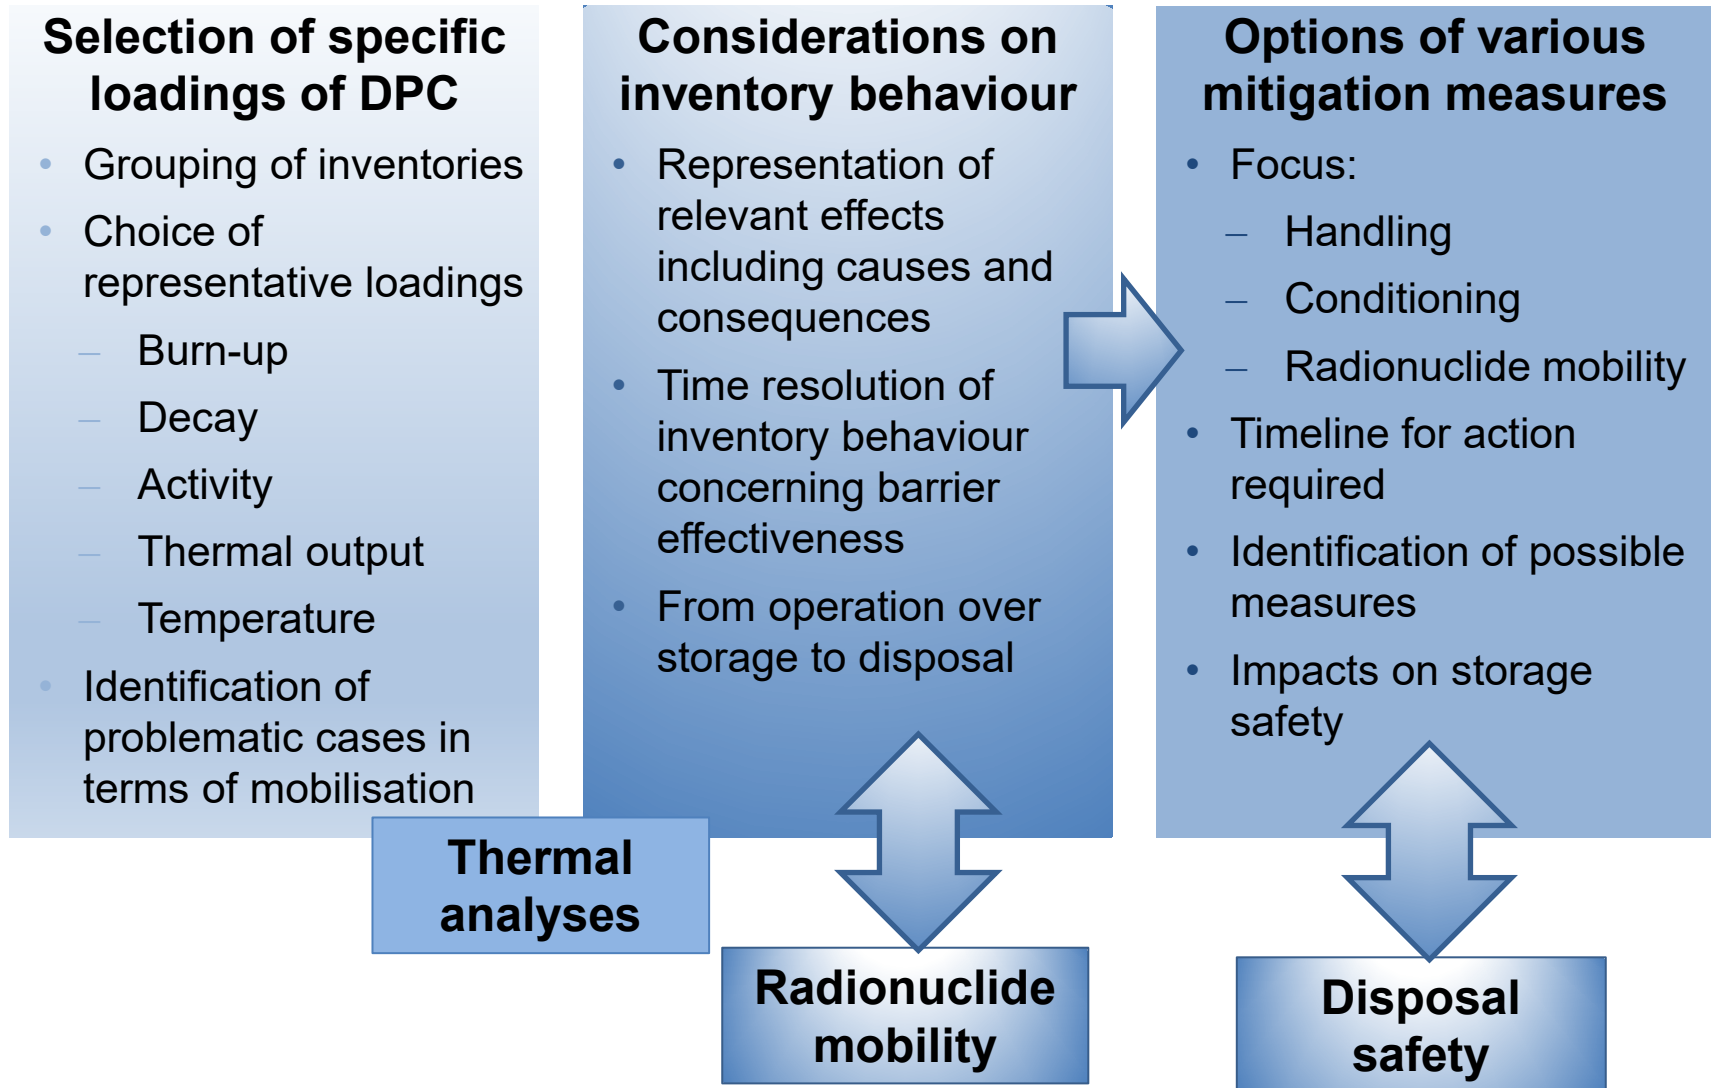

## Results of Storage Analysis

- **Currently, no evidence of systematic failure during prolonged storage** of cladding, enclosures, or barriers of the inventories considered if the casks continue to meet their safety functions.
  - **thermal analyses** indicate temperature levels that are not expected to produce any unacceptable temperature-driven effects and thus **no significant negative effects on material behavior** during prolonged storage
  - **radiation-induced effects** on the fuel/glass matrix and the surrounding material **are to be regarded as low**
- Consideration of **hypothetical scenarios** in which temperature, radiation and effects of radioactive decay can lead to impairment of the integrity of the enclosure (basis for derivation of options/measures)
  - temperature-induced effects addressable by measures during storage or early-transport/conditioning before effect occurs
  - effects caused by radioactive decay addressable by early-transport/conditioning before effect occurs
- Identified knowledge gaps should be addressed by R&D (e.g. on material properties)

## Repository and Radionuclide (RN) Mobility Analysis

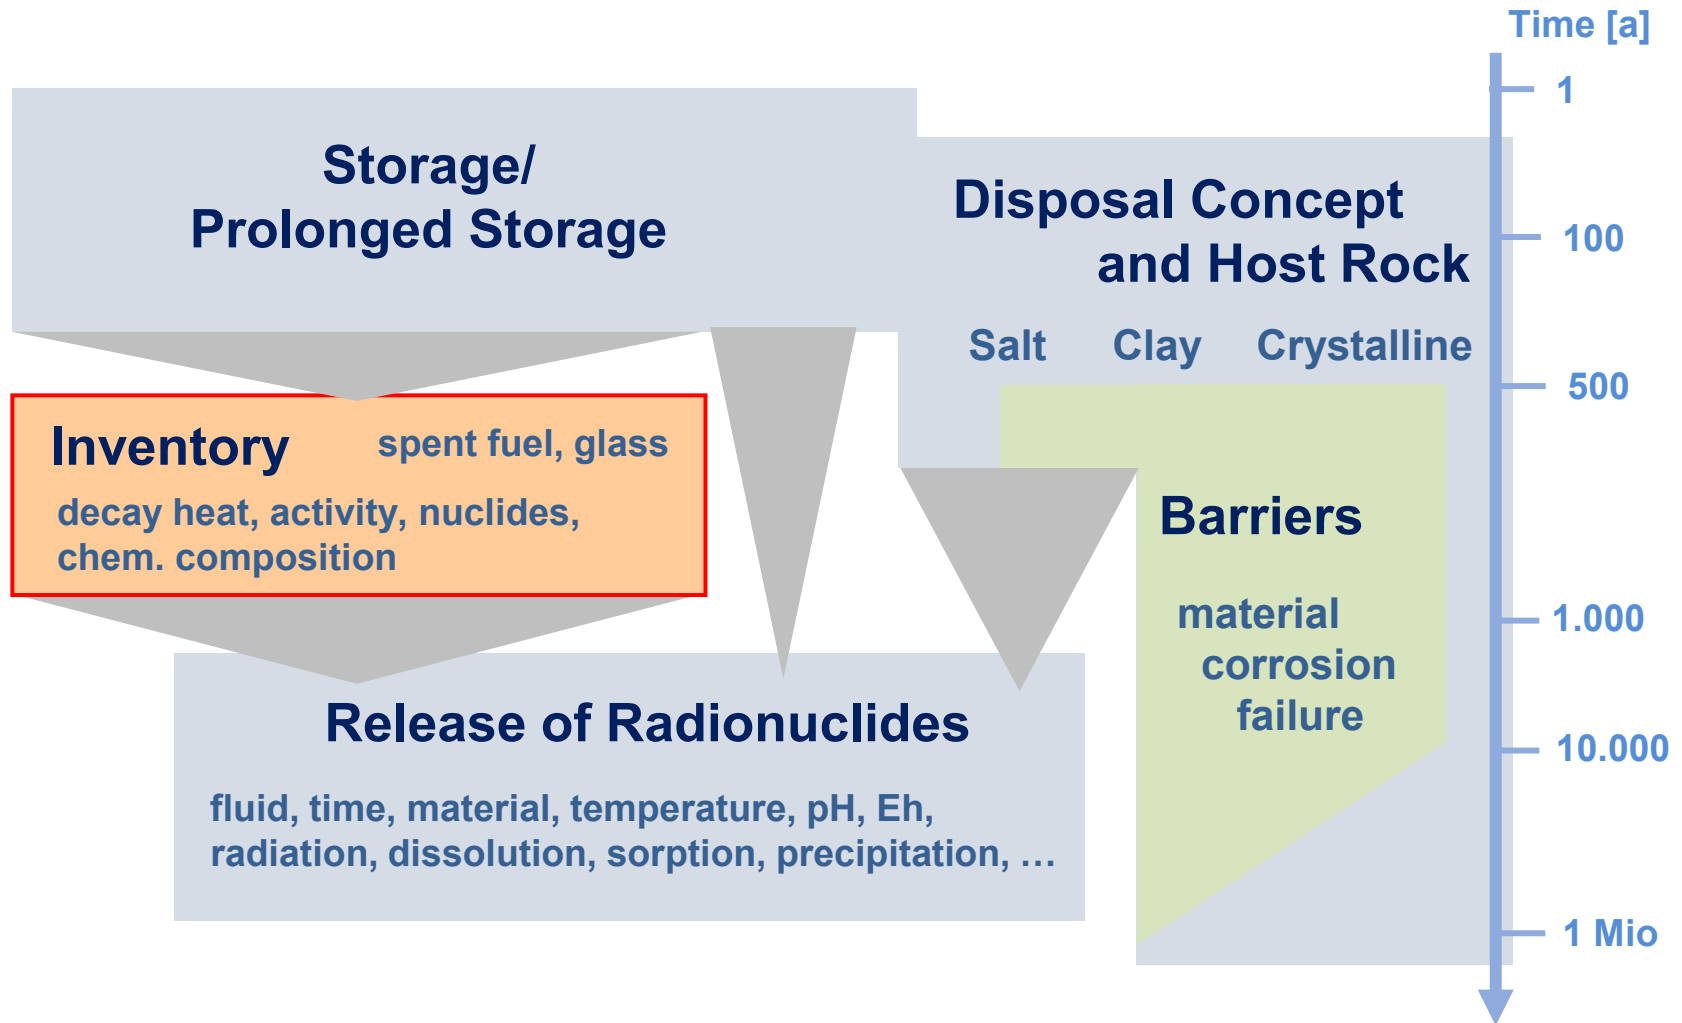



## Corrosion Models: Parameter Studies - HAW-Glass

- **Water flux**
  - Conservatively assumed unlimited,
  - No consumption
- **Glass surface**
  - 1,7 m<sup>2</sup> („ideal“/geometric surface)
  - 3 diff. values assumed
- **Temperature [°C]**
  - T<sub>0</sub> = 200, 150, 100
- **Barriers failure [a]**
  - 500, 1000, 10000

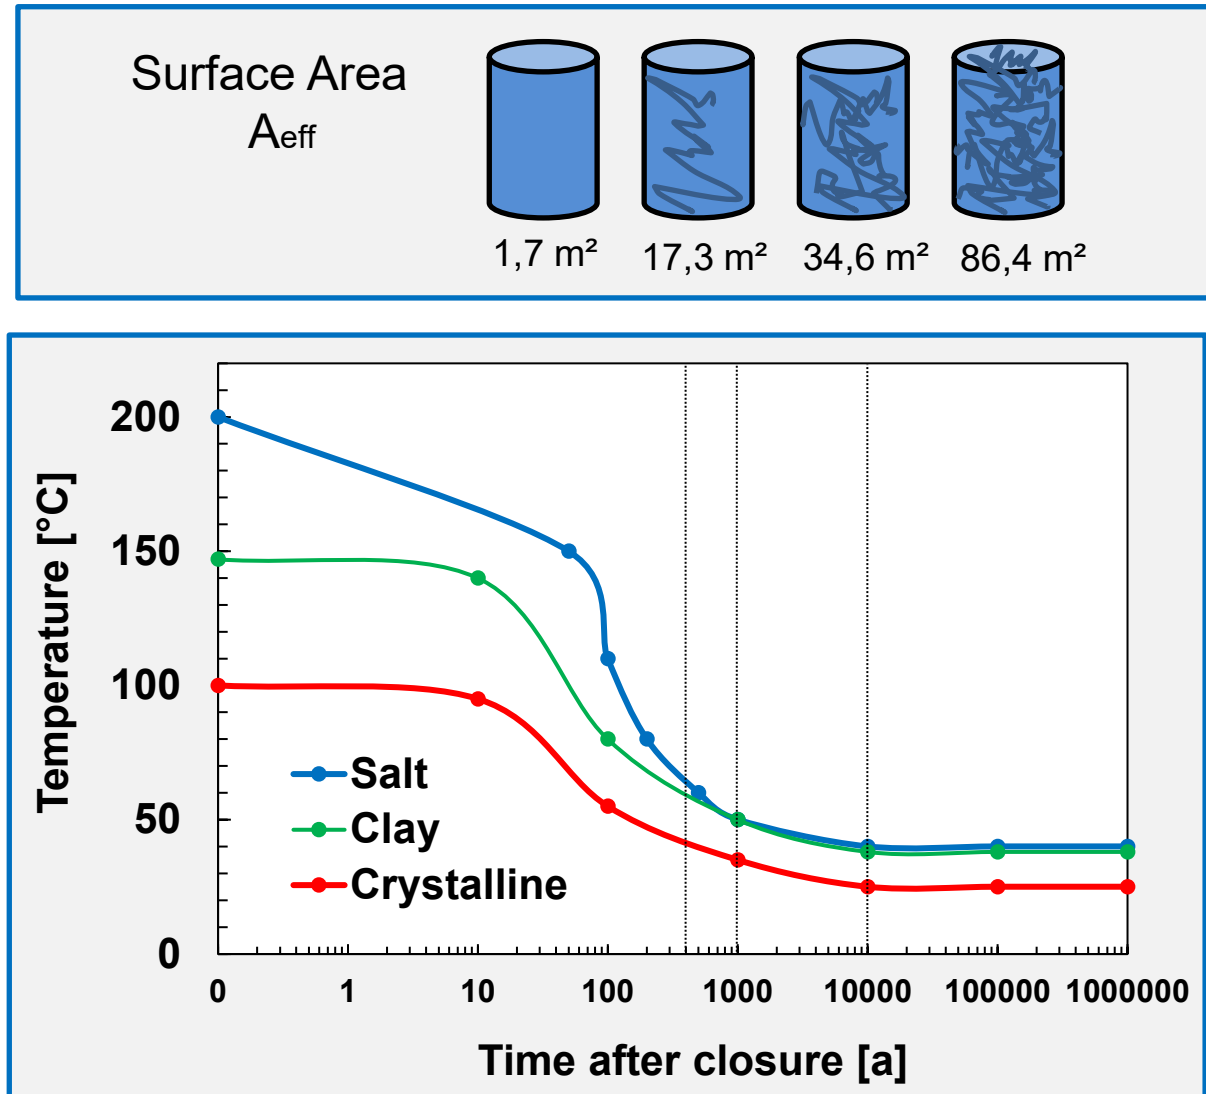

## Corrosion Models: HAW-Glass – Results

- ➔ Time dependency of corrosion rates for vitrified waste based on available surface – **parameter study** – **unlimited fluid availability**

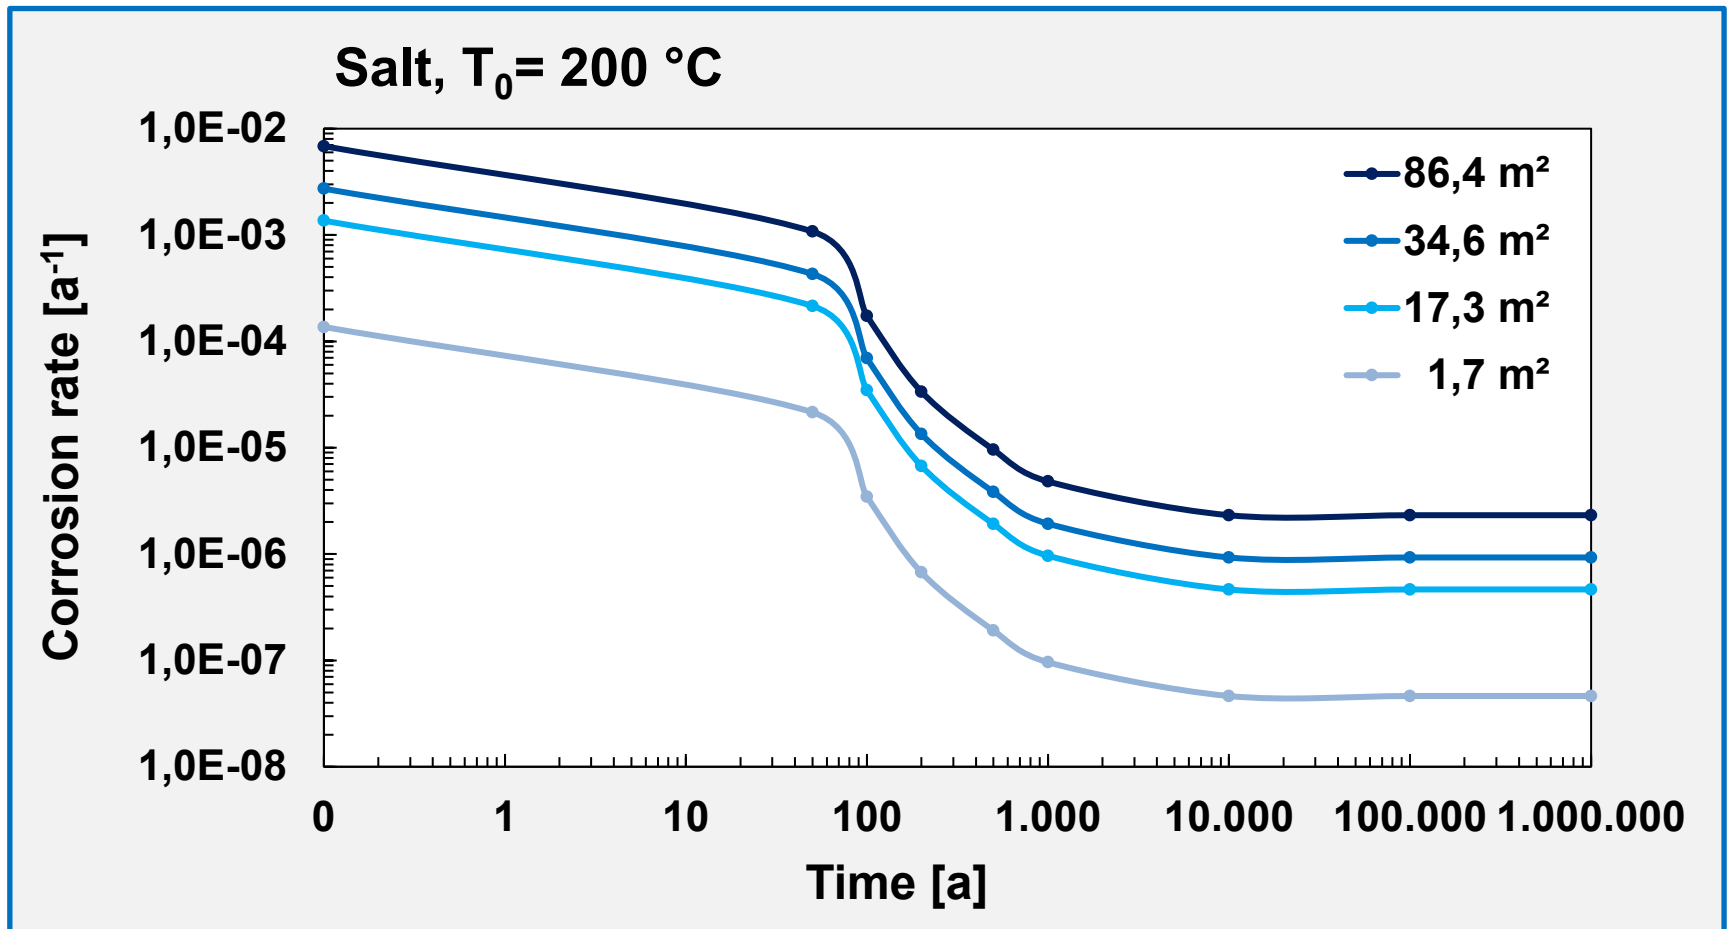

## Corrosion Models – Parameter Studies Summary

### Results

- Inventory corrodes, contact time with fluid determines start, inventory/activity at the given time is used

- Model for **vitrified waste** depends on temperature and **surface area**

$$\vec{r} = A_{eff}^{Glas} \cdot \frac{1}{m_{Glas}} \cdot F \cdot e^{\left(\frac{-E_a}{RT(t)}\right)}$$

- Model for LWR depends on radiation chemical yield (alpha activity), surface of fuel
- Release fractions from fuel/glass matrix (consideration of the **near field** only)

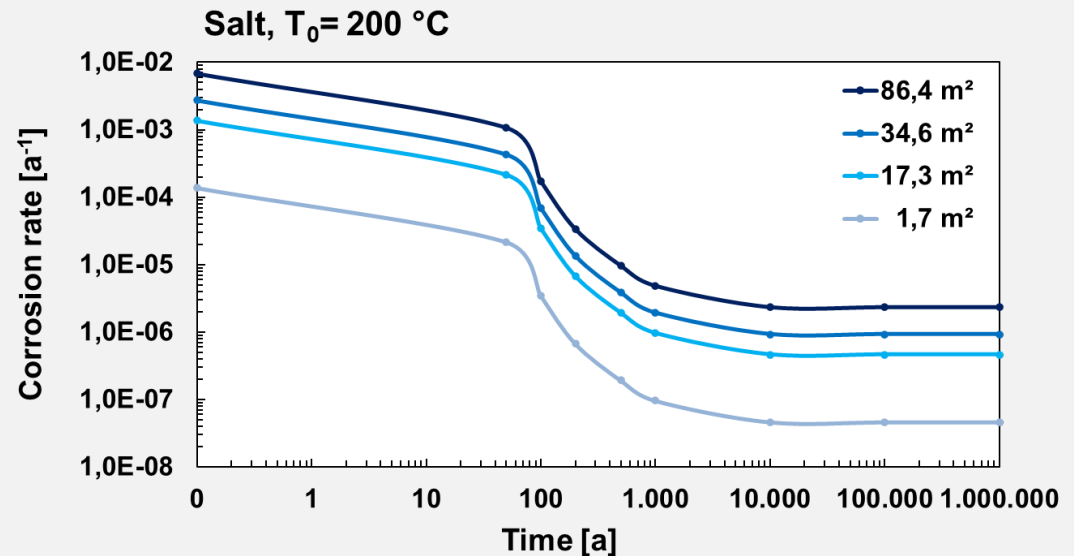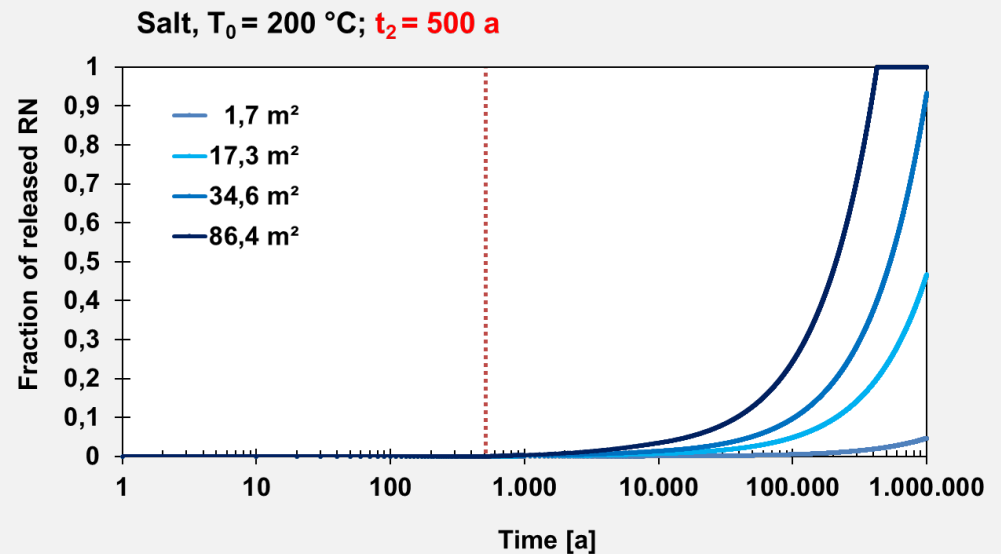

## Generic Flow Chart of Effects, Consequences and Possible Actions

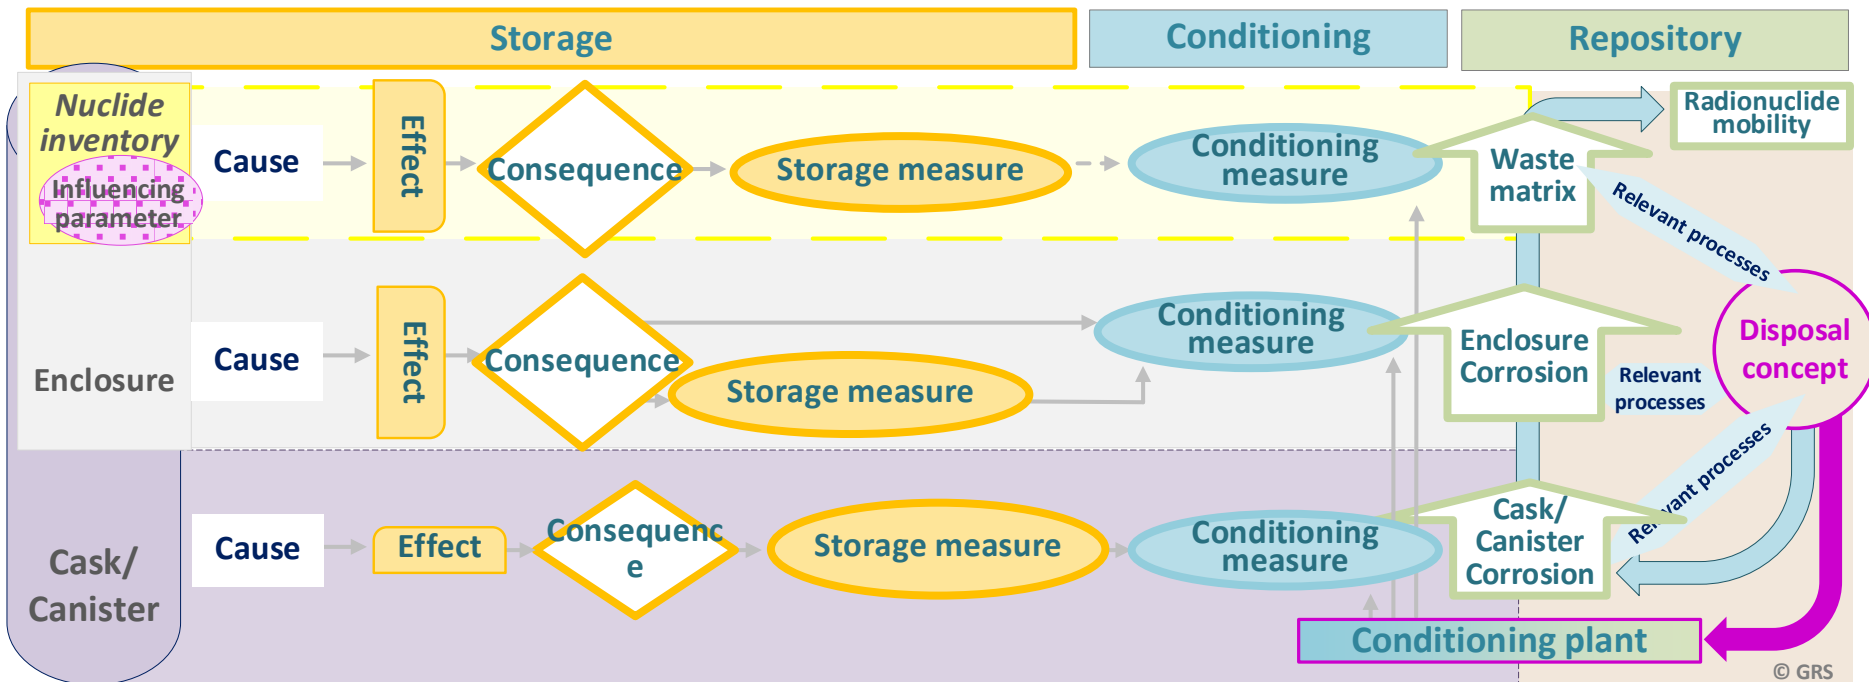

### Compilation of possible actions for:

- **Vitrified high active waste**
- LWR fuel assemblies
- WWR fuel assemblies
- AVR/THTR fuel assemblies
- Research reactor fuel assemblies

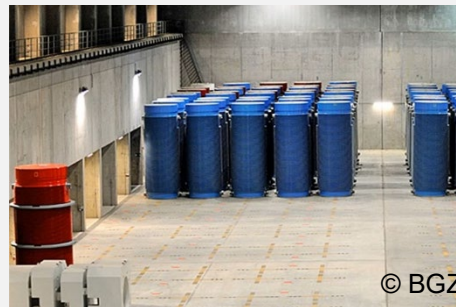

Storage

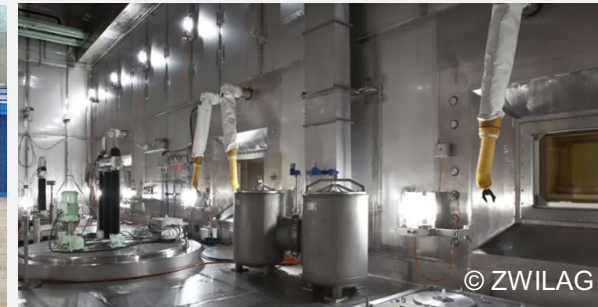

Conditioning



### Example: Vitrified Radioactive Waste

#### Measures

- I. Thermal Treatment
- II. Early-Transport

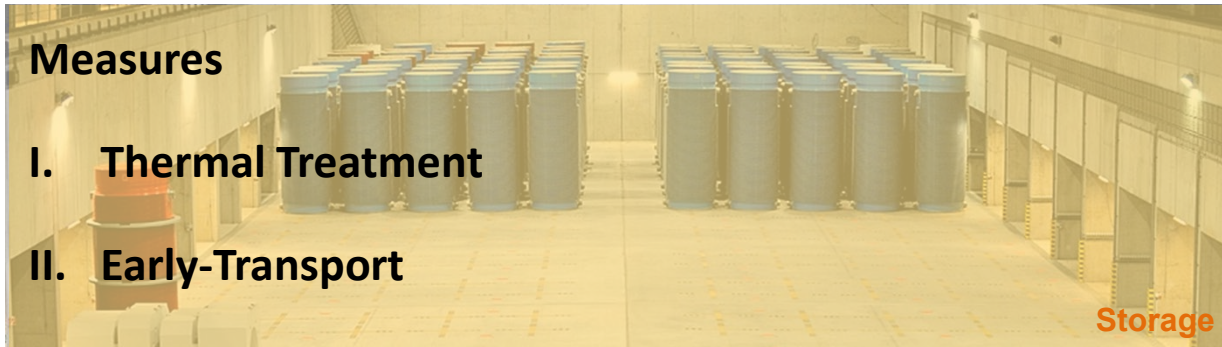

- I. Early-Transport/Conditioning
- II. Overpack
- III. Thermal Treatment

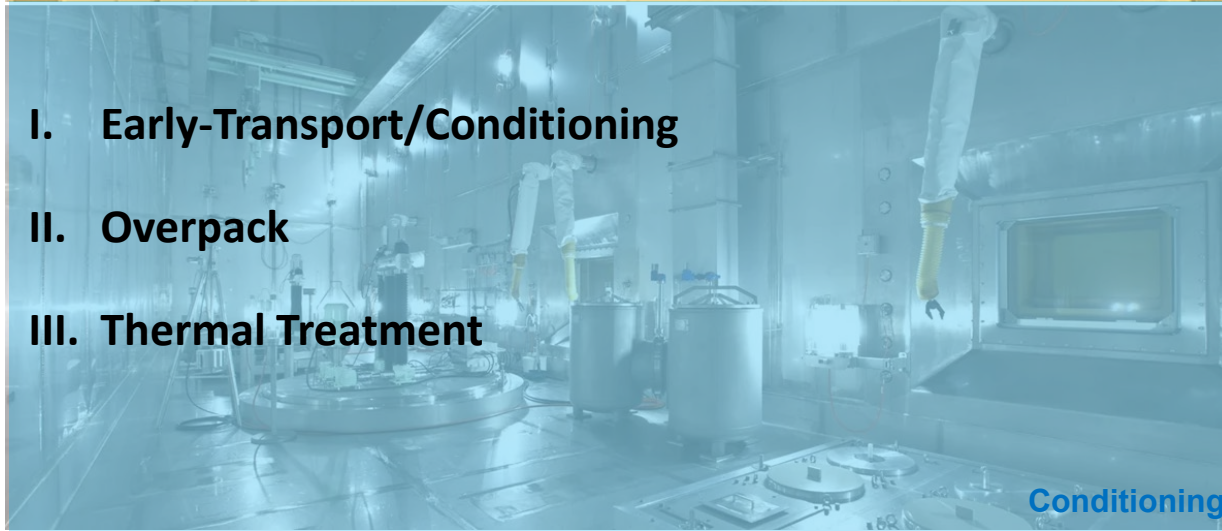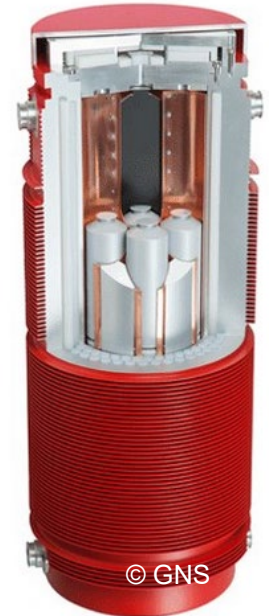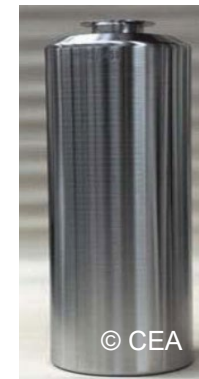

### Vitrified Radioactive Waste

#### Measures

##### I. Thermal Treatment

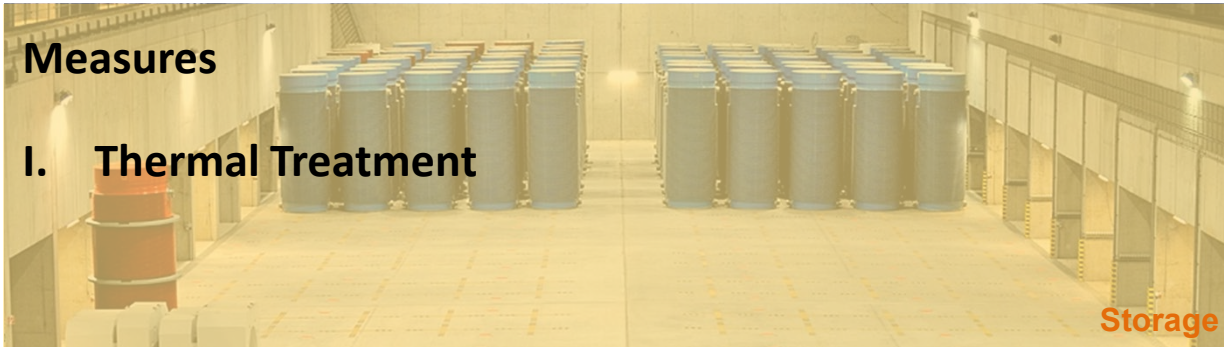

*In comparison to the reference case:*

- ☒ *Radionuclide mobility*
- ☐ *Radiation protection*
- ☐ *Handling*
- ☐ *Storage*

Effect: — Degradation of the glass matrix

Cause: — Alpha-decay, decay gas

Consequence: — Increase of the inner surface due to glass defects

Goal: — **Reduction of the inner glass surface**  
→ direct influence on corrosion rate in the modell (RN Mobility Analysis)

**Technical feasibility has to be evaluated!**

### Vitrified Radioactive Waste

#### Measures

##### I. Thermal Treatment

##### II. Early-Transport

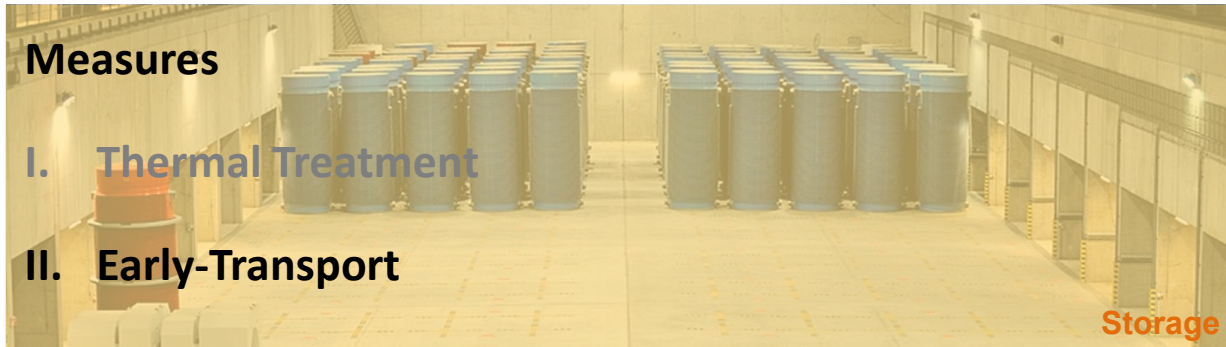

*In comparison to the reference case:*

- ☐ Radionuclide mobility
- ☐ Radiation protection
- ☐ Handling
- ☐ Storage

Effect: — Gas accumulation in the stainless steel canister

Cause: — Release of helium from the glass matrix

Consequence: — Pressure build up and potential loss of integrity of the stainless steel canister and helium release in the cask

Goal: — **Early-transport to conditioning plant to prevent loss of integrity**

## Vitrified Radioactive Waste

### Measures

#### I. Early-Transport/Conditioning

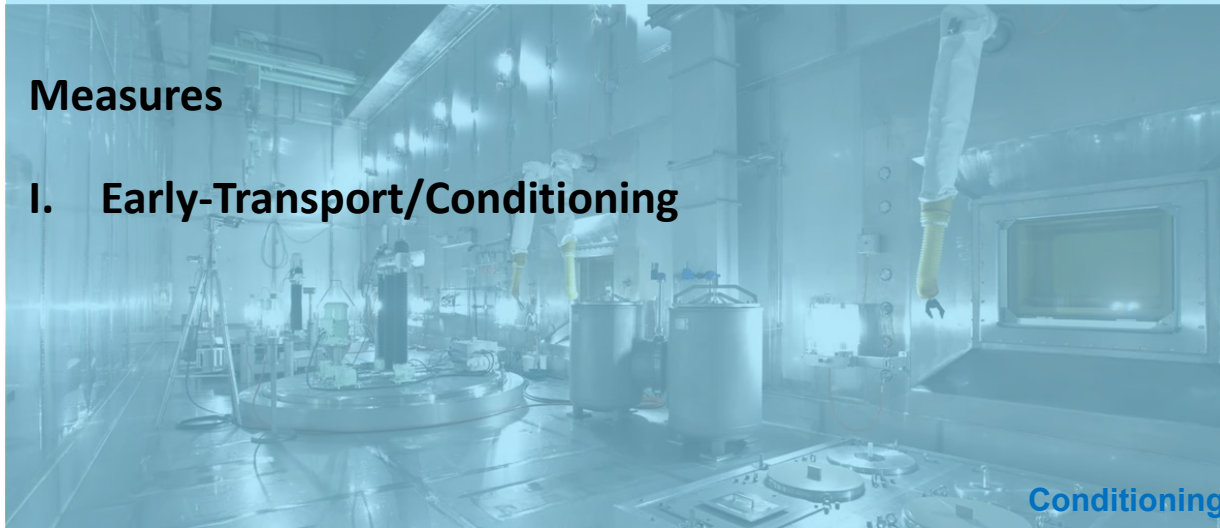

*In comparison to the reference case:*

- ☐ Radionuclide mobility
- ☒ Radiation protection
- ☐ Handling

- Effect: — Gas accumulation in the stainless steel canister
- Cause: — Release of helium (from alpha decay) from the glass matrix
- Consequence: — Pressure build up and potential loss of integrity of the stainless steel canister and helium release in the cask
- Goal: — Early-transport to conditioning plant to prevent loss of integrity**



### Vitrified Radioactive Waste

#### Measures

#### III. Early-Transport/Conditioning

#### IV. Overpack

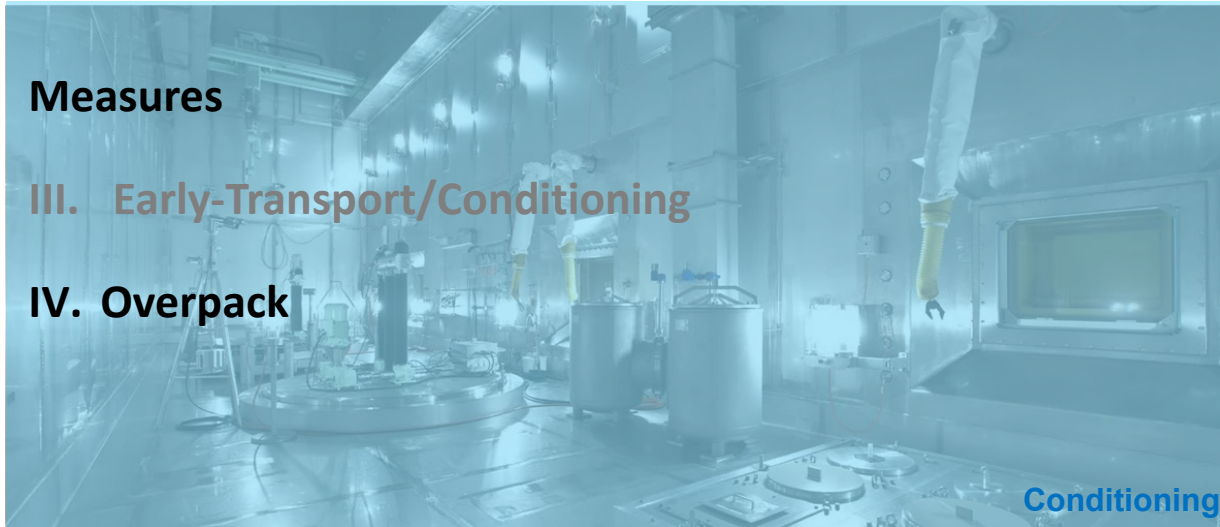

*In comparison to the reference case:*

- ☐ Radionuclide mobility
- ☒ Radiation protection
- ☐ Handling

- Effect: — Gas accumulation in the stainless steel canister
- Cause: — Release of helium (from Alpha decay) from the glass matrix
- Consequence: — Pressure build up and potential loss of integrity of the stainless steel canister and helium release in the cask
- Goal: — **(Re-)establishment resp. preservation of the barrier**

### Vitrified Radioactive Waste

#### Measures

III. Early-Transport/Conditioning

IV. Overpack

V. Thermal Treatment

*In comparison to the reference case:*

- Radionuclide mobility
- Radiation protection
- Handling

Conditioning

Effect: — Degradation of the glas matrix

Cause: — Alpha-Decay, Decay Gas

Consequence: — Increase of the inner surface due to glas defects

Goal: — Reduction of the inner glass surface  
→ direct influence on corrosion rate in the modell (RN Mobility Analysis)

## Overview of possible measures

|              | Measure                                          | RNM | HAN | Inventory type                         |
|--------------|--------------------------------------------------|-----|-----|----------------------------------------|
| Storage      | Thermal Treatment                                | X   |     | Vitrified Radioactive Waste            |
|              | Early-Transport                                  |     | X   | Vitrified Radioactive Waste, LWR, WWER |
|              | Heating                                          |     | X   | LWR                                    |
|              | Gentler procedure                                |     | X   | LWR                                    |
| Conditioning | Early-Transport/Conditioning                     |     | X   | Vitrified Radioactive Waste, LWR, WWER |
|              | Overpack                                         |     | X   | Vitrified Radioactive Waste            |
|              | Re-packing/Overpack for Stainless Steel Canister |     | X   | AVR/THTR                               |
|              | Thermal Treatment                                | X   |     | Vitrified Radioactive Waste            |
|              | Encapsulation of Fuel Assemblies                 |     | X   | LWR, WWER, FR-BE                       |
|              | Heating/Quenching                                |     | X   | LWR                                    |
|              | DPC used as Disposal Canister                    |     | X   | LWR, FR-BE                             |
|              | Welding of Canisters                             |     | X   | AVR/THTR                               |

RNM = Radionuclide Mobility, HAN = Handling

### Conclusion

- KombiLyse project systematically examined the interactions between storage and final disposal with regard to **storage safety** and **radionuclide mobility** (safety of disposal) within the final repository (causes – effects – consequences).
- Resulting course of actions rely on **hypothetical scenarios** developed during storage analysis.
- Summary table reflects only **direct influence** on RN mobility according to the model used for the repository analysis and the **reference case** (“doing nothing”, no (unforeseen further) effects during storage, transport to conditioning and transfer to final disposal canister), neglecting possible positive (or detrimental) effects
- Repository site and disposal concept are a prerequisite for the conditioning of the inventories
  - ➡ without specified acceptance criteria the presented course of actions cannot be finally evaluated concerning plausibility and feasibility
- Resulting mitigation measures and actions described aim to
  - **maintain or restore** the handling properties of HAW-glass/fuel elements
  - and/or to **delay** RN mobility within the near field of the final repository



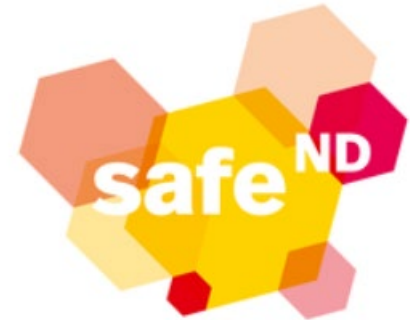

# Thank you for your attention!

*The research project "Combined analysis of safety-relevant aspects from the perspectives of storage and disposal of high-radioactive waste taking into account longer periods of storage (KombiLyse)" has been commissioned by BASE under the project number 4719F10701. Project start: 01.08.2020, term: ~ 3 years*

*This presentation reflects the view and opinion of the contractor and does not have to agree with the opinion of the client.*

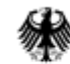

Federal Office  
for the Safety of  
Nuclear Waste Management
