# Supplementary material for: Workshop – impact of extended interim storage of high-level radioactive waste on the safety of final disposal
Source: Copernicus journal article supplement (doi:10.5194/sand-2-193-2023), 2023-09-06
Supplement: Supplementary file 3 [file sand-2-193-2023-supplement.zip]

# Interim storage - final disposal interdependences: Progressing fuel rod degradation processes constrain the disposal container optimization

Volker Metz, Ph.D.

Institute for Nuclear Waste Disposal (INE), Karlsruhe Institute of Technology  
volker.metz@kit.edu

safeND Workshop 06 “Impact of extended interim storage of high-level  
radioactive waste on the final disposal”, Berlin, 14<sup>th</sup> September 2023

Am

Bk

Np

U

Th

Cm

Pu

INE

Institut für Nukleare Entsorgung

“Pathways for waste management” (“Entsorgungspfade”): Focus on pathways from

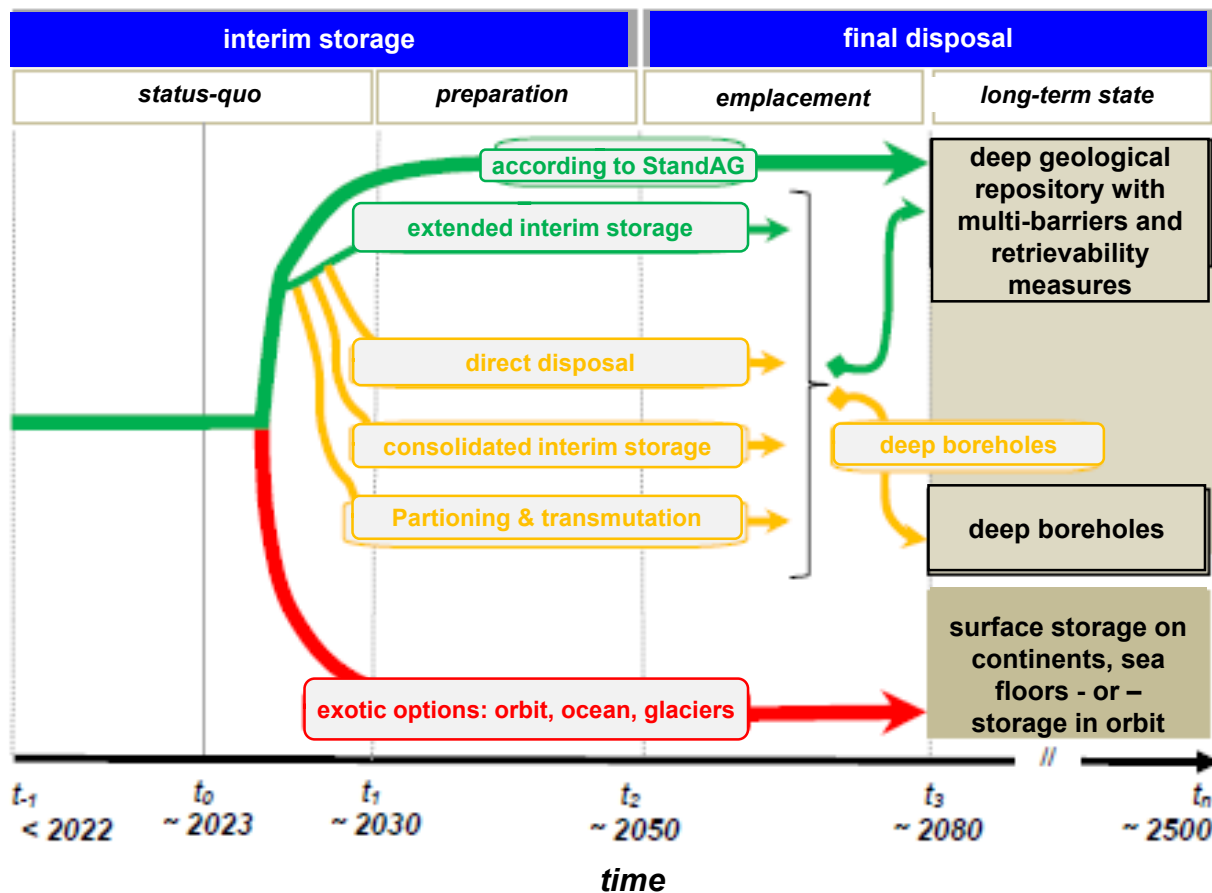

present state, i.e. **interim storage** in facilities at land surface → long-term state, i.e. **disposal in deep geological repository (DGR)** with retrievability measures

- disposal of spent nuclear fuel (SNF)
- reprocessing of SNF and afterwards disposal of HLW-glass

Figure adapted after Scheer, D., Becker, F., Hassel, T., Hocke, P., Leusmann, T., Metz, V. (2023) Trittsicherheit auf Zukunftspfaden? In: Eckhardt, A. et al., “Entscheidungen für die Zukunft: Ungewissheiten bei der Entsorgung hochradioaktiver Abfälle”, Springer.

# Pathways from interim storage to final disposal

**wet interim storage**

**transfer**

**DGR with multi-barriers  
& retrievability measures**

**overpack  
for transfer**

**final disposal  
container,  
design depends  
on host rock**

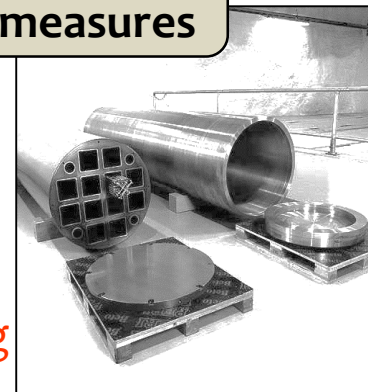

Safety of interim storage relies on permanent functioning of water cooling

Examples: Belgium, Finland, France, Japan, South Korea, Sweden (...)

**dry interim storage**

**transfer**

**DGR with multi-barriers  
& retrievability measures**

**final disposal  
container, design  
depends on host  
rock**

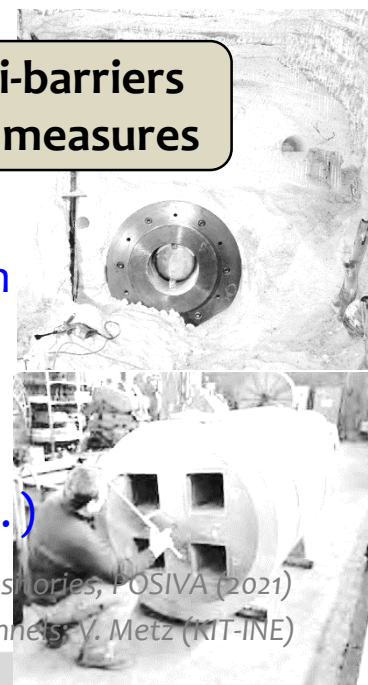

Passive safety provided by dual-purpose casks (DPC, e.g. CASTOR®)

Examples: Belgium, France, Germany, Japan, Switzerland, Ukraine, USA (...)

Image sources: H. Widestrand & P. Schillebeeckx (2016) SF Characterisation Program for Implementation of Repositories, POSIVA (2021) [www.posiva.fi/en/index/news/pressreleasesstockexchangereleases/2021/excavationofworldsfirstfinaldepositiontunnels](http://www.posiva.fi/en/index/news/pressreleasesstockexchangereleases/2021/excavationofworldsfirstfinaldepositiontunnels), V. Metz (KIT-INE)

wet interim storage

transfer

DGR with multi-barriers  
& retrievability measures

overpack  
for transfer

final disposal  
container

loading of  
transfer cask

conditioning  
in hot cell

repackaging into final  
disposal container

dry interim storage

transfer

DGR with multi-barriers  
& retrievability measures

final disposal  
container

conditioning  
in hot cell

repackaging into final  
disposal container

Image sources: H. Widestrand & P. Schillebeeckx (2016); NAGRA, courtesy of L. Johnson (2008); SKB, Technical Report, TR-01-03 (2000); GRS (2008) Endlagerung wärmeentwickelnder Abfälle in Deutschland, GRS-247 (2008); ANDRA (2006) 269 VA Phenomenological evolution of a geological repository; V. Metz (KIT-INE)



conditioning → e.g. filling of cask with  $\text{Fe}_3\text{O}_4$  or other material to ensure sub-criticality

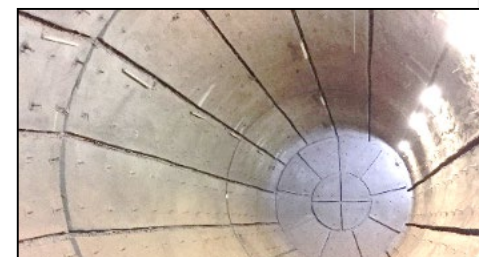

dry interim storage

transfer

DGR with multi-barriers  
without retrievability measures

conditioning  
in hot cell

no repackaging,  
however conditioning  
of inventory

Sources: Bonano et al. (2018) MRS Advances. Filbert et al. (2011) WM2011 Conference. Graf et al. (2012) KTG Tagung. Image source: V. Metz (KIT-INE)

- In general interim storage facilities are allowed to store spent nuclear fuel (SNF) and highly active vitrified waste (HLW) for few decades\* years
  - but, due to delays in site selection, licensing and construction of deep geological repositories, it will be needed to extend interim storage to longer time intervals, possibly around 100 or more years
  - Presently, numerous states finalize their preparation of predisposal activities including detailed design of an interim storage system that should be able to safely preserve SNF and HLW for an extended time interval (more than 100 years), until a suitable final disposal facility is available
- \* In Germany, permits for individual DPC (Befristung der Aufbewahrungsgenehmigung) are limited to 40 years after closure according to AtG §6*

ZWILAG, Switzerland

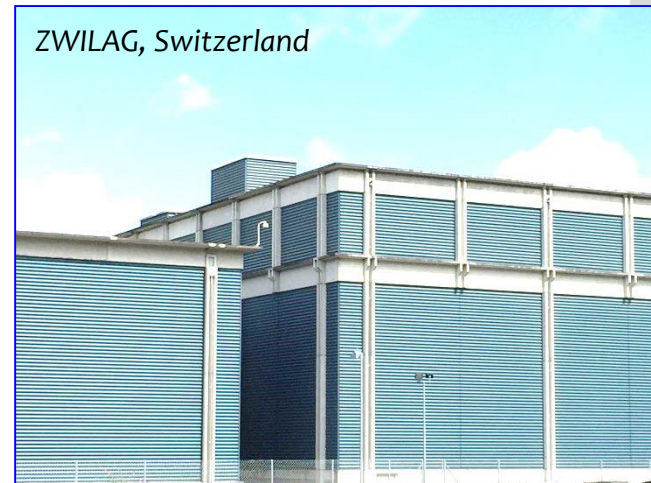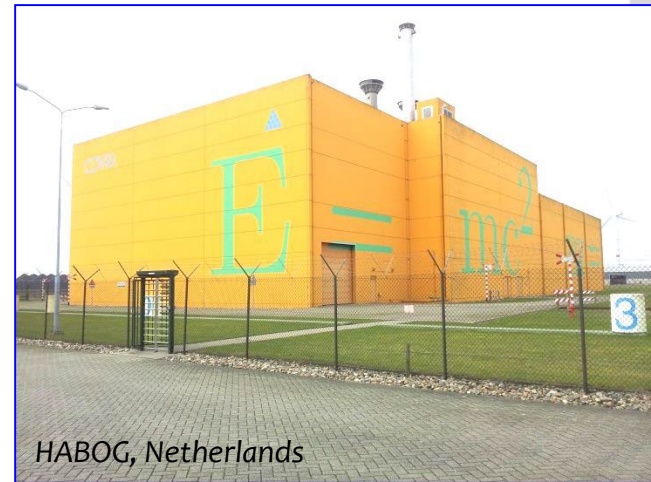

HABOG, Netherlands

Image source: Metz, V., Schepperle, J. (KIT-INE)

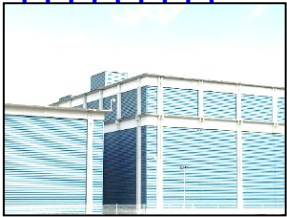

First loadings of CASTOR®  
THTR/AVR 1992; HLW 1997

expire of licenses for interim  
storage facilities (AtG §6):  
AVR Jülich 2013, other  
facilities 2034 - 2047

prolonged interim storage, successive  
transport from interim storage sites to  
conditioning and / or disposal site

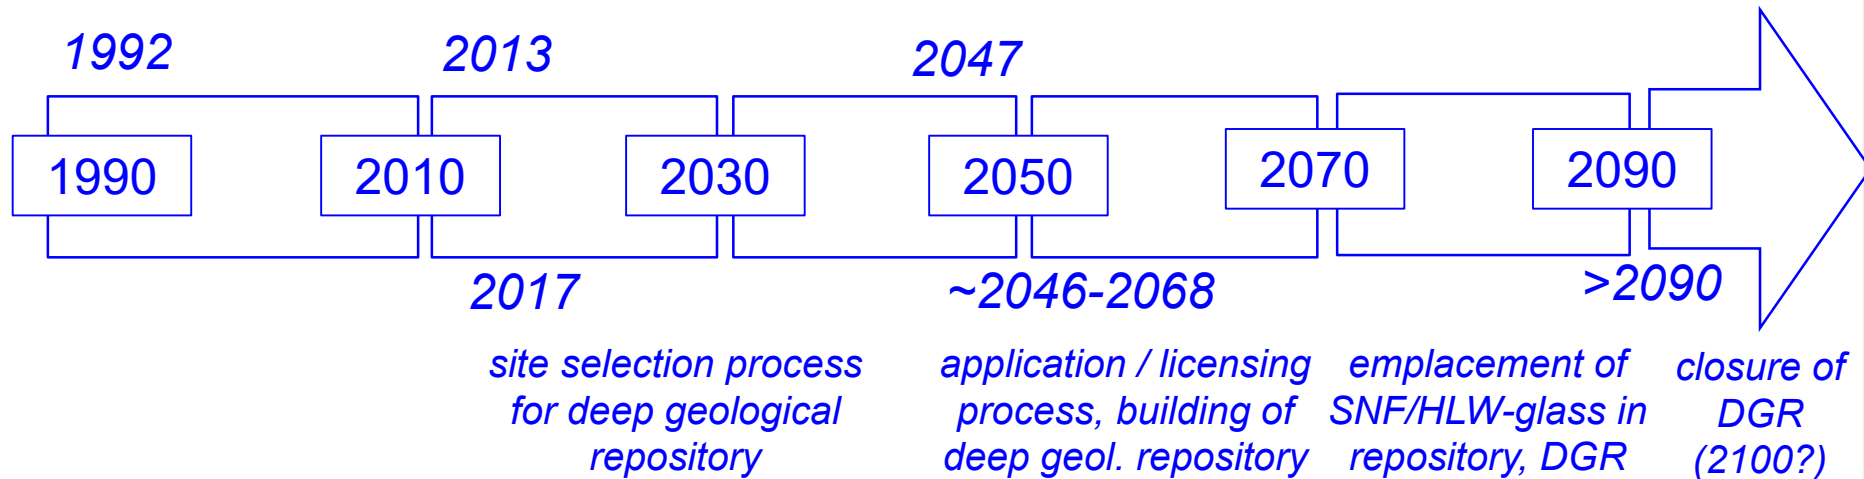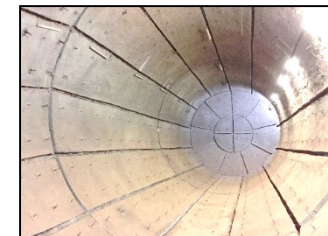

Sources: NaPro (2015); BGE (2022) press release 11. Nov. 2022; BASE (2022) press release 14. Nov. 2022; ESK (2023)  
Verlängerte Zwischenlagerung bestrahlter Brennelemente und sonstiger hochradioaktiver Abfälle in Abhängigkeit  
von der Auswahl des Endlagerstandorts, 23. March 2023

Security issues →

„The dry spent fuel storage facility project for Zaporizhzhya NPP is based on VSC-24 cask design ... The storage facility project includes 380 VSCWVER-1000 casks.” (Steinberg et al., 2003)

One artillery shell (or more) destroyed a training building close to the reactors. Two other shells were found in the interim dry storage facility for spent nuclear fuel.

(Speicher, 2022)

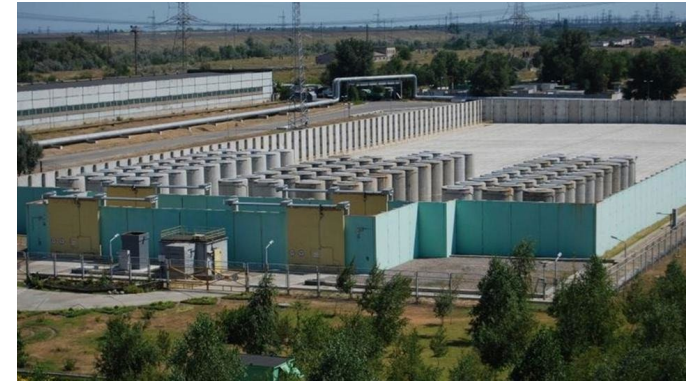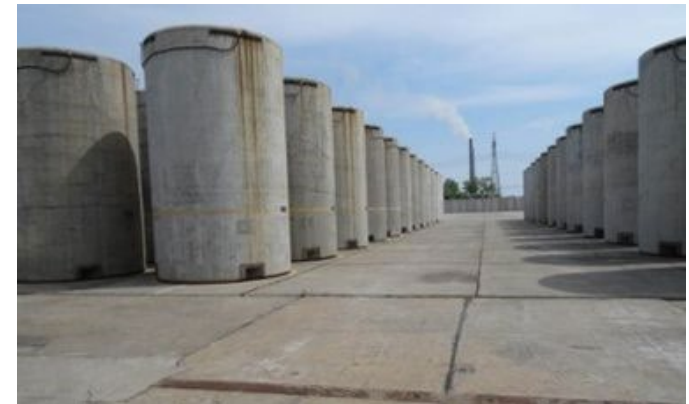

Sources: Speicher, C., 2022 (Neue Zürcher Zeitung, 26. April 2022; Steinberg, N., 2003 (IAEA-CN-102/49); Image sources: Guardian, 2014; IAEA, 2022; Energoatom, 2014



- With time, a continuous degradation of components of DPC (e.g. CASTOR®) and of the waste inventories (SNF and HLW glass) is progressing
- After interim storage, conditioning and repackaging of waste inventories from DPC to final disposal containers is needed
- Integrity of fuel rod cladding and stability of geometrical state of inventory are decisive for any conditioning and repackaging of SNF, in order to prevent any release of volatile radionuclides in the conditioning / repackaging facilities
- In case, the cladding integrity will not be ensured, reloading of fuel assemblies from DPC to final disposal containers will be considerably aggravated
- Degradation state of DPC and of inventories define the requirements for the design of final disposal containers as well as for design of conditioning facility (hot cell)

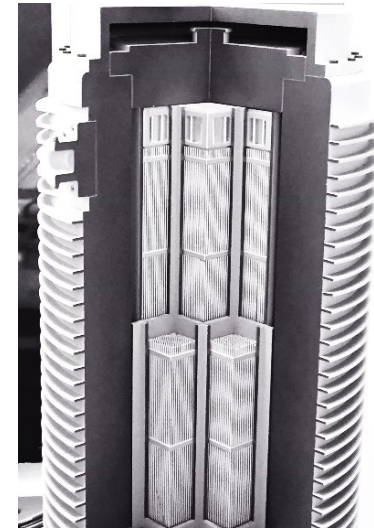

Sources: ESK (2015): Diskussionspapier zur verlängerten Zwischenlagerung bestrahlter Brennelemente und sonstiger Wärme entwickelnder radioaktiver Abfälle. Entsorgungskommission; ESK (2023) Verlängerte Zwischenlagerung bestrahlter Brennelemente und sonstiger hochradioaktiver Abfälle in Abhängigkeit von der Auswahl des Endlagerstandorts.

- For time spans  $\gg 40$  years, uncertainty about state of waste inventories is considerably increasing  $\rightarrow$  lack of knowledge
- Degradation state of waste inventory not only relevant for requirements of final disposal containers and of conditioning facilities but also for definition of radionuclide source term with respect to deep geological repository
- Stability of  $\text{UO}_2$  matrix, cladding corrosion rates and release rates of radionuclides depend on SNF degradation state
- *“Major degradation of the physical state linked to the accumulation of irradiation damages, to the accumulation of microbubbles, to the de-cohesion of the grain boundaries due to ageing (...) The current lack of knowledge on this crucial topic leads us to conservatively assume that the spent fuel physical state is fully degraded when assessing the RN source term.”*  
Poinssot et al. (2014)

Sources: Poinssot, C. et al. (2014) *Journal of Nuclear Science and Technology* 39. ESK (2023) *Verlängerte Zwischenlagerung bestrahlter Brennelemente und sonstiger hochradioaktiver Abfälle in Abhängigkeit von der Auswahl des Endlagerstandorts.*

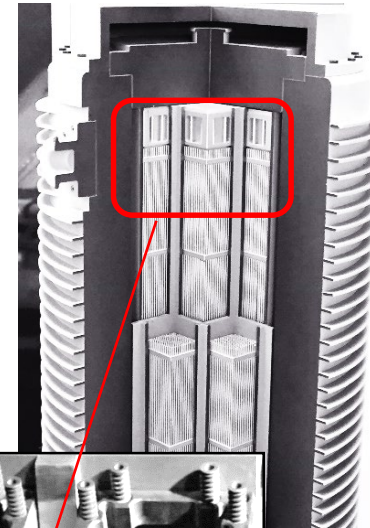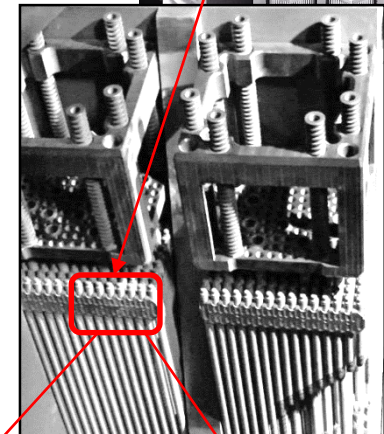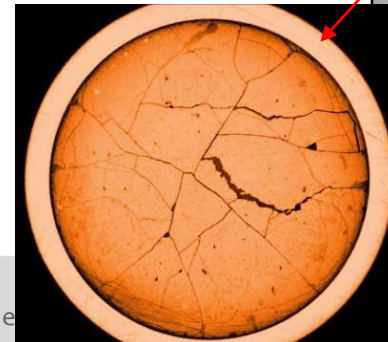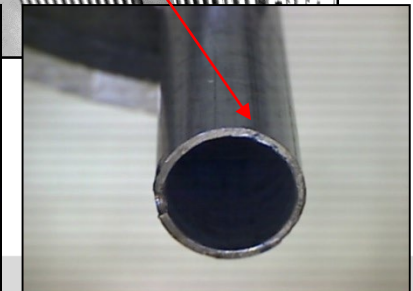

Long-term integrity of the cladding depends on

- resistance to ageing effects of the cladding itself
  - Zr-hydride reorientation and delayed hydride cracking
  - resistance of the cladding to internal pressure
  - resistance of the cladding to pellet cladding chemical interactions  
→ corrosion with volatile fission products at cladding / fuel interface
  - continued swelling of fuel due to He accumulation
  - fuel swelling due to oxidation of  $\text{UO}_2$  matrix
- in particular relevant for high burn-up  $\text{UO}_2$  fuels (HBU-SNF) and spent MOX fuels

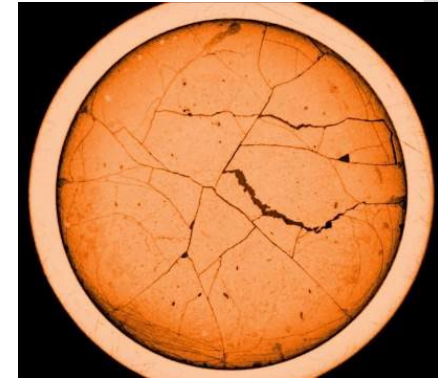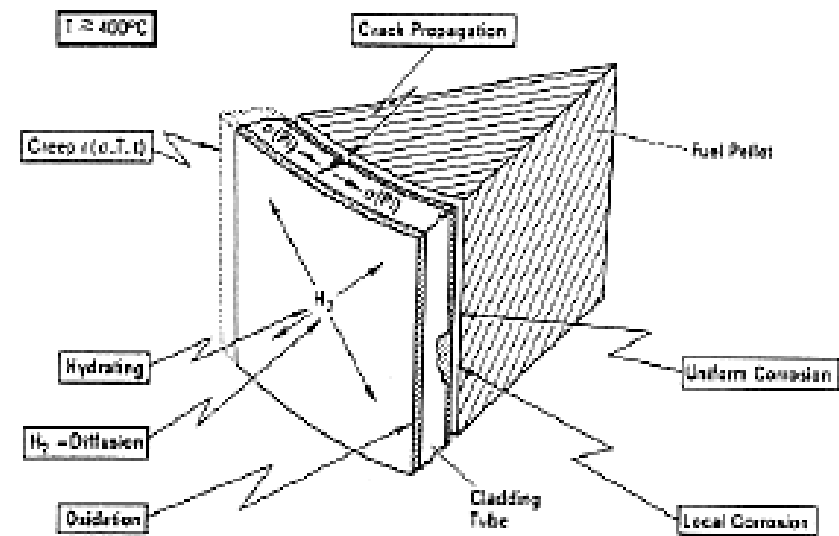

Source: IAEA (2003) *Spent fuel performance assessment and research (SPAR-I project)*, Tecdoc-1343; Spykman (2018) *Nucl. Eng. Technol.* 50, 313-317

Within fuel rods, gas inventory dominated by fission gases (Kr-83, Kr-84, Kr-85, Kr-86, Xe-131, Xe-132, Xe-134, Xe-136) in first centuries

After about ~700 years, gas inventory will be dominated by helium (due to  $\alpha$ -decay) – contribution of helium to pressure built-up to be negligible for a period of decades to few centuries

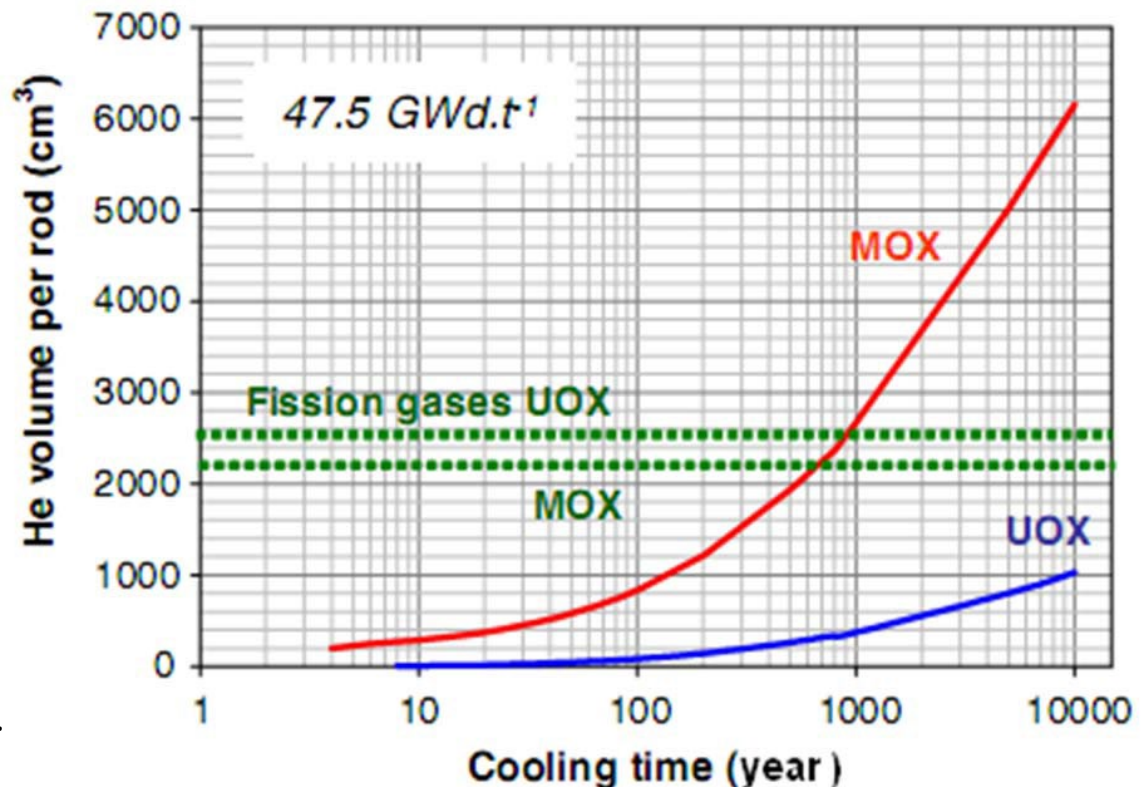

Sources: Poinssot, C. et al. (2014) Journal of Nuclear Science and Technology 39; Gonzalez-Robles, R. et al. (2016), Journal of Nuclear Materials 479.



Hoop stress of fuel rod cladding and rod internal pressure increase due to fission gas production during irradiation, swelling of  $\text{UO}_2$  matrix, temperature effects and others

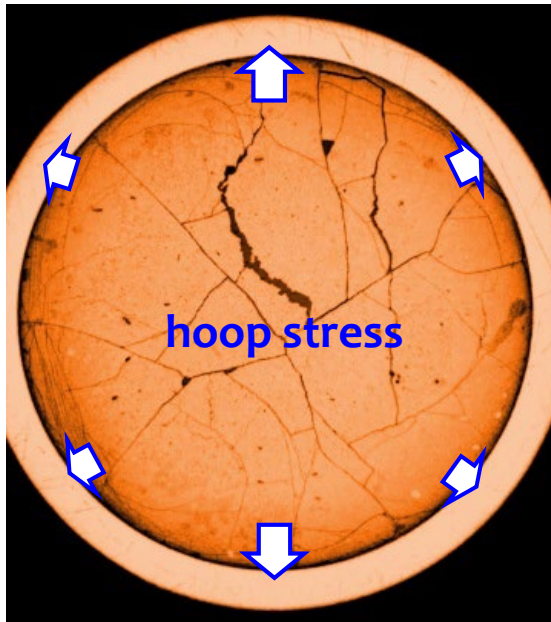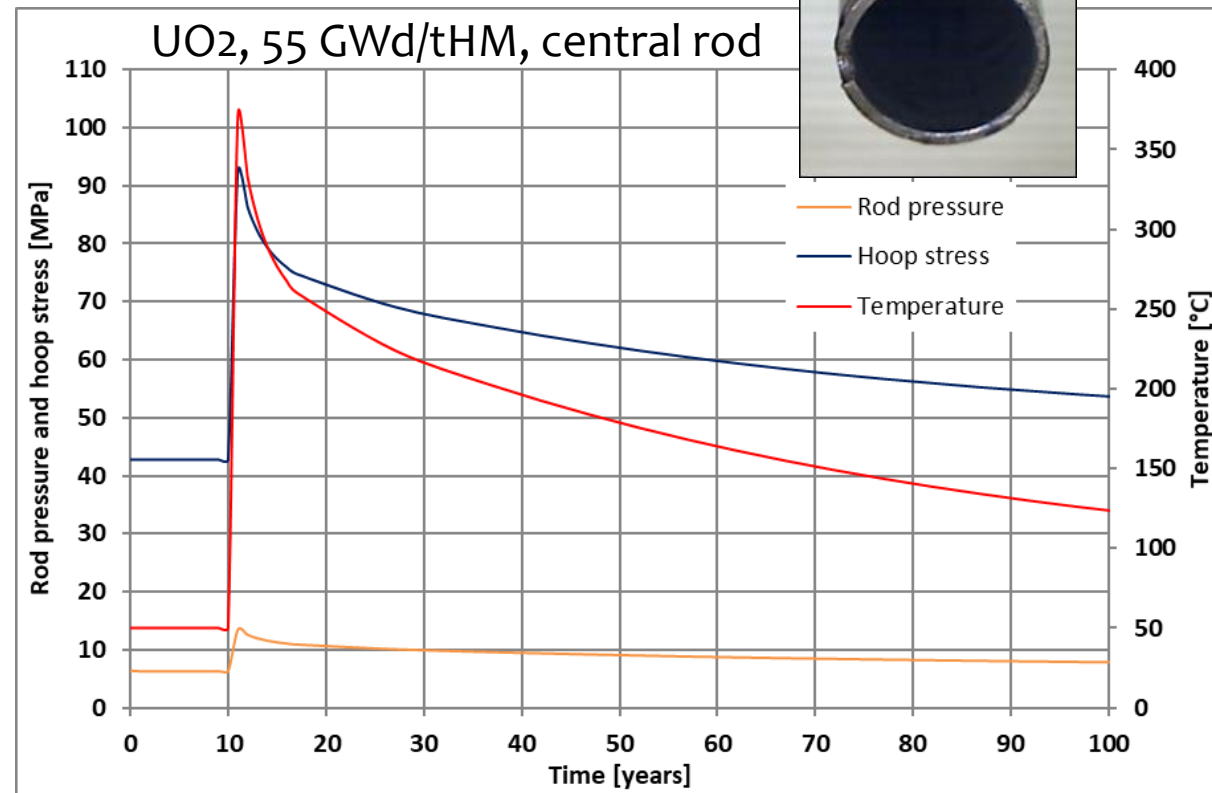

Sources: Rowold, F. (2018) GRS "Open questions on the road to reliable predictions", GRS workshop "safety of extended dry storage of spent nuclear fuel, Garching; Institut für Nukleare Entsorgung, KIT-INE

- Due to migration of Cl-36, I-129, Cs-137, Cs-135 from pellet centre to pellet periphery → enrichment in rim zone
- At low burnup, gap between fuel and cladding is still open
- At higher burnup, gap closed
- Cs-U-O-Zr-Cl bearing compounds determined by SEM-EDX, XPS at fuel-cladding interface (e.g. König et al., 2021) → fuel-cladding (chemical) interaction, FCCI

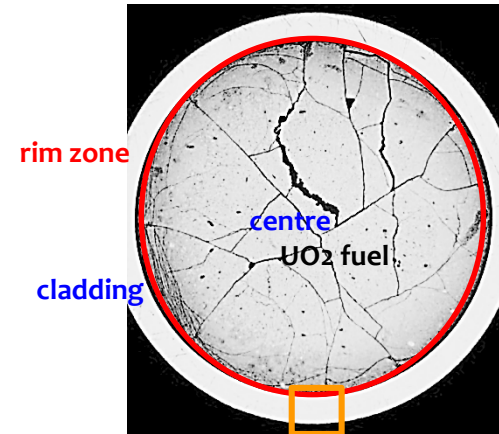

## irradiated LWR $\text{UO}_2$ fuels

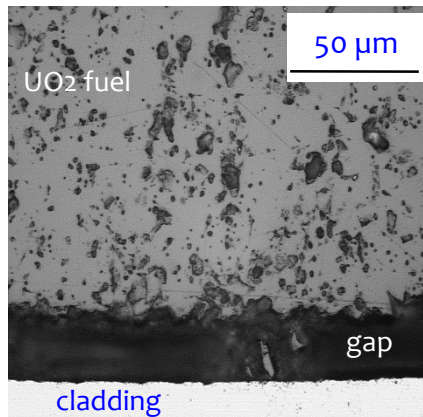

low BU: 20 GWd/tHM

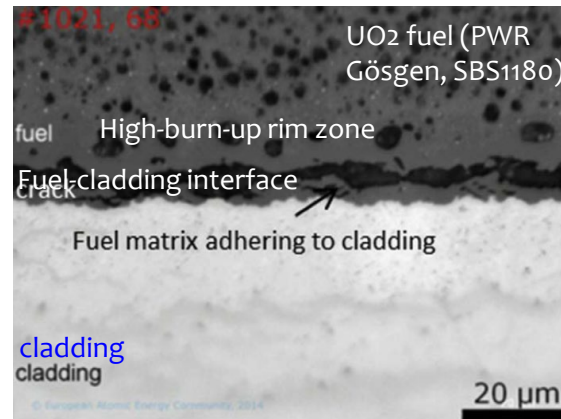

medium BU: 50 GWd/tHM

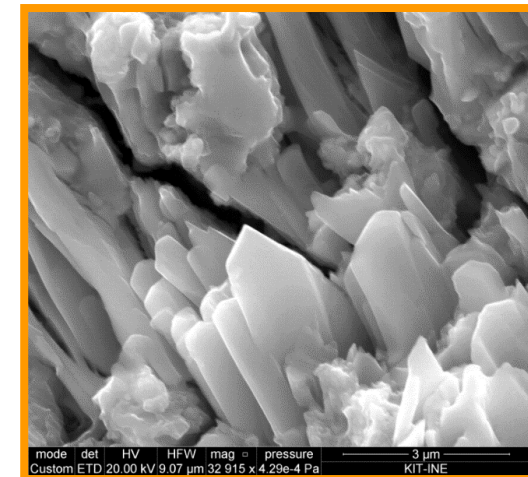

Sources: König, T. et al. (2021) SEDS; Lemmens, K., Gonzalez-Robles, E. et al. (2017) J. Nucl. Mat. 484, 307-323.  
Fanghänel, T. et al. (2013) Inorg. Chem.

- At outer Zircaloy surface formation of zirconium oxide,  $\text{ZrO}_2$ , and hydrogen due to contact of cladding with cooling water during reactor  $\text{Zr} + 2 \text{H}_2\text{O} \rightarrow \text{ZrO}_2 + 2 \text{H}_2$
- Diffusion of hydrogen into Zircaloy and formation of zirconium hydrides,  $\text{ZrH}_{2-x}$ , which are oriented parallel to surface, initially
- During interim storage reorientation  $\rightarrow$  radially oriented zirconium hydrides  $\rightarrow$  cracking of cladding

UO<sub>2</sub> 50.4 GWd/t<sub>HM</sub>  
with Zircaloy-4

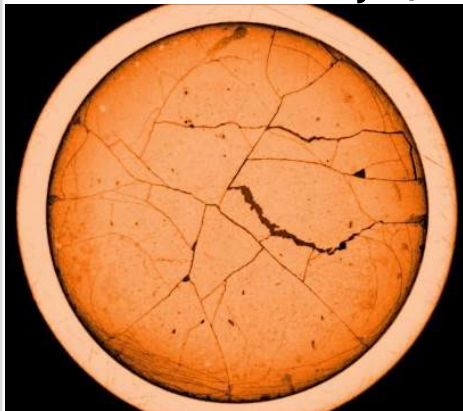

ZIRLO cladding after H<sub>2</sub> loading at  
110 Mpa, 350°C

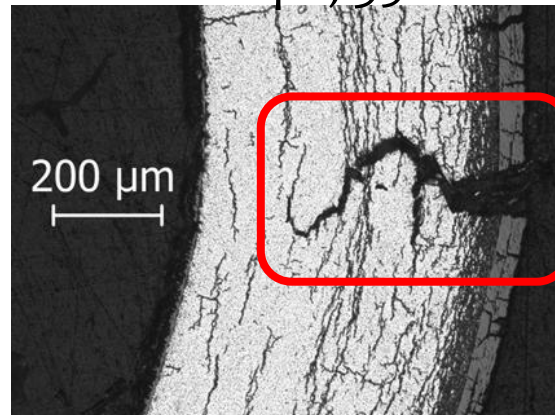

Zircaloy-4 of UO<sub>2</sub> 64  
GWd/t<sub>HM</sub>

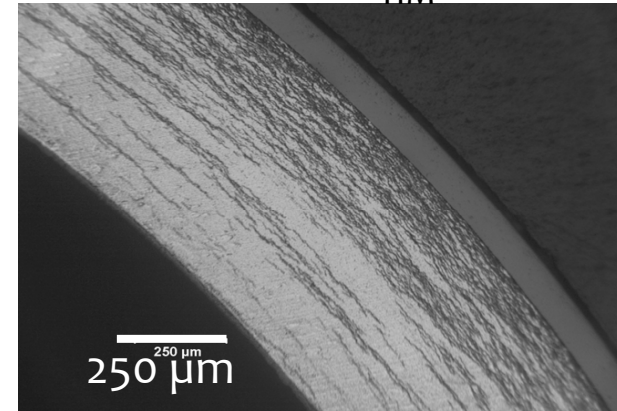

Image sources: M.C. Billone, T.A. Burtseva, J.P. Dobrzynski, D.P. Mc Gann, K. Byrne, Z.Han, Y.Y. Liu. FCRD-USED-2012-000039; M.C. Billone, T. Burtseva, M.A. Martin-Rengel, Effects of Lower Drying-Storage Temperatures on the DBTT of High-Burnup PWR cladding. FCRD-UFD-2015-00008. ANL-15121; Institut für Nukleare Entsorgung, KIT-INE

## Disposal of Dual Purpose Casks as an alternative?

- DPC (e.g. CASTOR®) have been optimized for loading in reactors, transport and interim storage of HLW → but DPC are not "optimal" for final disposal (Bonano et al., 2018).
- Under repository conditions, long-term safety of final disposal of SNF and HLW-glass in DPC is rather doubtful
- How long does a DPC retain its integrity under final disposal conditions?  
→ container integrity and corrosion resistance is questionable  
→ cooling fins would act as preferential surfaces for corrosion
- Existing DPC loaded with SNF are subcritical under interim storage conditions – subcriticality under repository conditions is uncertain  
→ relatively high loading of DPC with fissile material  
→ “The studies so far do not conclusively demonstrate subcriticality...”  
Filbert et al. (2011); assessment of subcriticality for disposal in granitic rock, argillaceous rock and rock salt not published;  
→ for proof of subcriticality, scenarios with water ingress and chemical reactions for selective mobilization, transport and subsequent enrichment of fissile materials to be considered (Hardin et al., 2015)

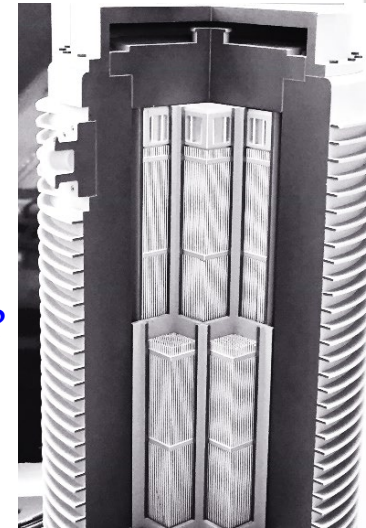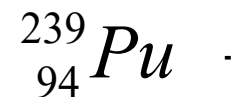

$$t_{1/2} = 24110 \text{ a}$$

$$\sigma_f = 743 \text{ b}$$

$$\sigma_a = 1019 \text{ b}$$

Sources: Filbert et al. (2011) WM2011 Conference.



- Doubts about long-term corrosion integrity and sub-criticality
- corrosion of ~130 t Fe per DPC would produce enormous amount of H<sub>2</sub>
- compatibility with geotechnical barriers not tested
- no retrievability concept

It's rather doubtful whether DPC can ensure long-term integrity without extensive conditioning, such as upgrading of corrosion protection or machining of cooling fins → disposal of small amounts of SNF in Dual Purpose Casks may be considered

*“In Studien wurde auch eine direkte Endlagerung der Zwischenlagerbehälter (vor allem CASTOR®-Behälter) diskutiert. Wegen der großen Unsicherheiten bezüglich einer Realisierung wird dieses Konzept im Rahmen dieses Papiers nicht weiter betrachtet [...] Sollte eine direkte Endlagerung von TLB ohne weitere Behandlungsschritte wie das Verfüllen des TLB möglich sein, ist eine Konditionierungsanlage für die Umverpackung nicht erforderlich. Dies dürfte allerdings nur für eine Teilmenge der Fall sein“ (ESK, 2023)*

Source: ESK (2023) Verlängerte Zwischenlagerung bestrahlter Brennelemente und sonstiger hochradioaktiver Abfälle in Abhängigkeit von der Auswahl des Endlagerstandorts.

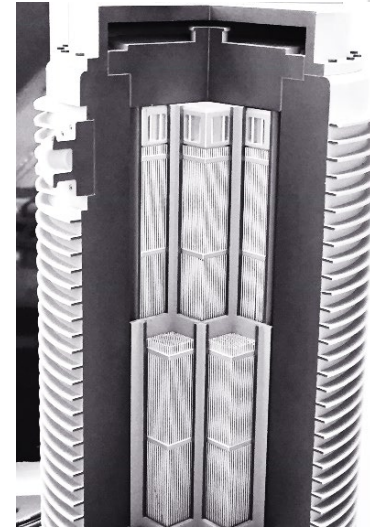

- Considering a selection of the final disposal site in 2031, NaPro (2015) proposed continued interim storage in 16 facilities until transfer of high level waste to final disposal site
  - Taking into account a significant delay in the site selection and thereby a prolonged interim storage, alternative options for the distribution [and design] of interim storage facilities may be considered (ESK, 2023)
    - one centralized storage facility
    - few “consolidated” / regional storage facilities
- considerations about hot cells as part of an centralized facility or of consolidated facilities

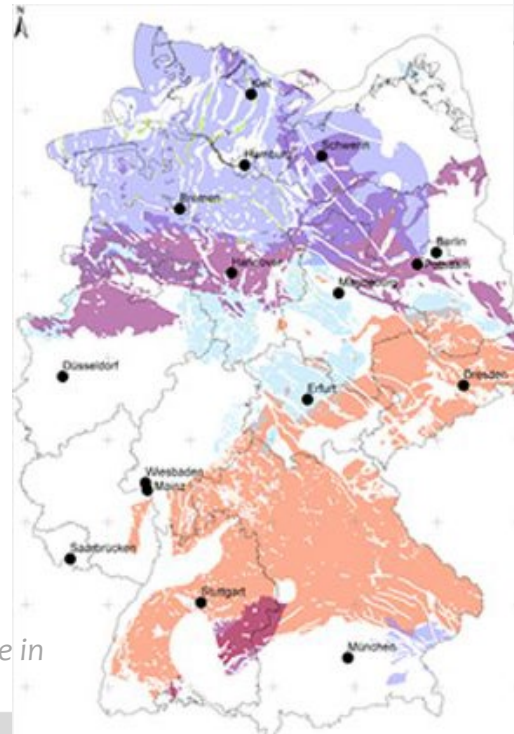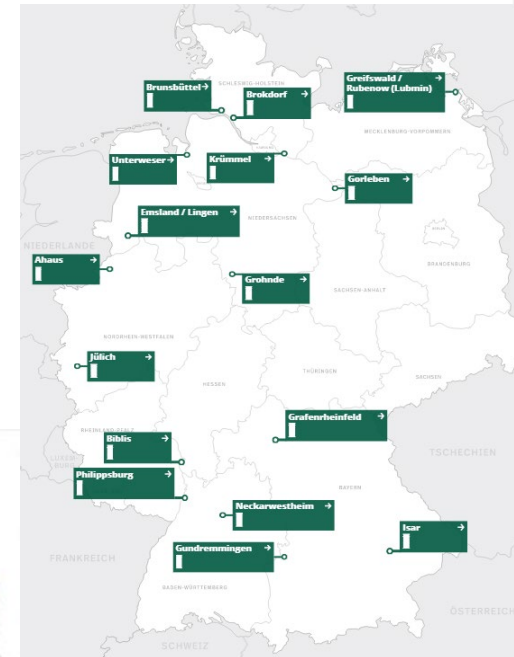

Sources: NaPro (2015); ESK (2023) Verlängerte Zwischenlagerung bestrahlter Brennelemente und sonstiger hochradioaktiver Abfälle in Abhängigkeit von der Auswahl des Endlagerstandorts.

Image sources: BASE,  
[https://www.base.bund.de/karte-zwischenlagerung/index.html#/BGE\\_Teilgebietebericht](https://www.base.bund.de/karte-zwischenlagerung/index.html#/BGE_Teilgebietebericht)

- Degradation state of dual purpose casks and of inventories define the requirements for the design of final disposal containers
- uncertainty about state of waste inventories is considerably increasing
- „Die Auswirkungen von Alterung über lange Zwischenlagerzeiträume sind hinsichtlich der Zwischenlagerung selbst [...] und] der sich anschließenden Entsorgungsschritte Konditionierung und Einlagerung von Bedeutung. [...] Es] ist derzeit offen, ob sich hieraus Konsequenzen für die einzelnen Entsorgungsschritte und/oder die sicherheitstechnische Nachweisführung ergeben.“ (ESK, 2023)
- “The current lack of knowledge on this crucial topic leads us to conservatively assume that the spent fuel physical state is fully degraded when assessing the RN source term” Poinssot et al. (2014)
- Research needed to deal with relevant knowledge gaps
- Lab studies on Zr-hydride reorientation and pellet cladding chemical interaction, in particular with HBU-SNF, MOX -> last loading of DPC (CASTOR®) with SNF planned for 2027
- Real scale studies: Inspection of DPC and inventory of DPC for instance within EPRI program (USA), previously opening and inspection of DPC loaded with 45 MWd/kg SNF after 15 years of dry interim storage (ANL-03/17, NUREG/CR-6831)

Sources: Poinssot, C. et al. (2014) *Journal of Nuclear Science and Technology* 39. ESK (2023) *Verlängerte Zwischenlagerung bestrahlter Brennelemente und sonstiger hochradioaktiver Abfälle in Abhängigkeit von der Auswahl des Endlagerstandorts.*

- Frank Becker, Michel Herm, Tobias König (KIT-INE, Karlsruhe)
- Thomas Hassel (LUH, Hannover)
- Peter, Hocke, Dirk Scheer (KIT-ITAS, Karlsruhe)

Thank you for your attention!

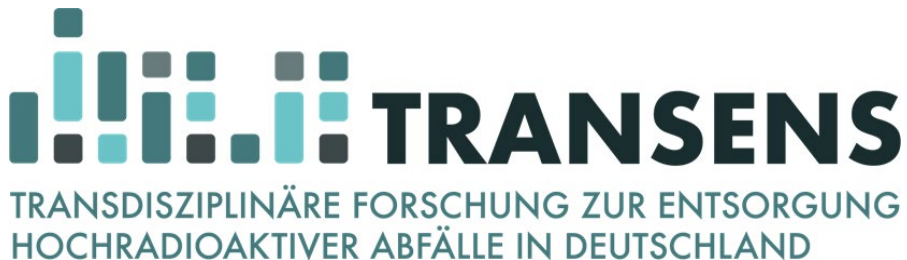

Gefördert durch:

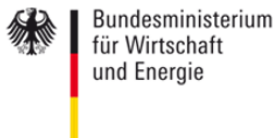

aufgrund eines Beschlusses  
des Deutschen Bundestages

Gefördert im  
Niedersächsischen Vorab der Volkswagenstiftung

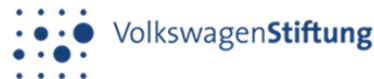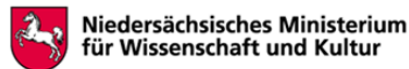

Förderkennzeichen: 02E11849A-J
